# Supplementary material for: Transition metal-free one-pot synthesis of substituted pyrroles by employing aza-Wittig reaction
Source: Royal Society of Chemistry journal article supplement (doi:10.1039/c9ra06778g), 2019-01-01
Supplement: c9ra06778g1.pdf [file c9ra06778g1.pdf]

## Supporting Information

### Transition metal-free one pot synthesis of substituted pyrroles by employing aza-Wittig reaction

Chetna Jadala,<sup>a</sup> Budaganaboyina Prasad,<sup>b</sup> A.V.G. Prashanti,<sup>b</sup> Nagula Shankaraiah,<sup>a\*</sup> Ahmed Kamal<sup>b,c\*</sup>

<sup>a</sup>*Department of Medicinal Chemistry, National Institute of Pharmaceutical Education and Research (NIPER), Hyderabad 500037, India*

<sup>b</sup>*Medicinal Chemistry & Pharmacology, CSIR-Indian Institute of Chemical Technology, Hyderabad 500007, India*

<sup>c</sup>*School of Pharmaceutical Education and Research (SPER), Jamia Hamdard, New Delhi, 110062, India*

| Contents                                           | Page No |
|----------------------------------------------------|---------|
| <sup>1</sup> H NMR and <sup>13</sup> C NMR spectra | 2-25    |

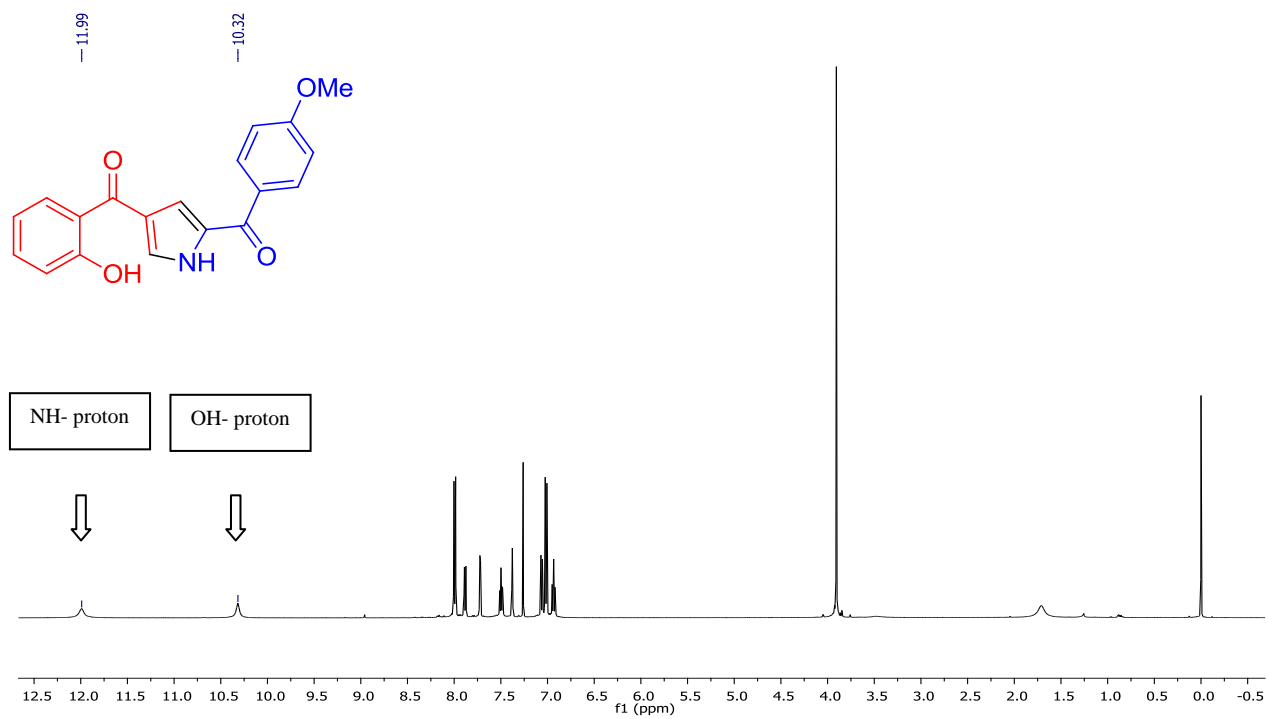

$^1\text{H}$  NMR (500 MHz,  $\text{CDCl}_3$ ) spectrum of **4b**.

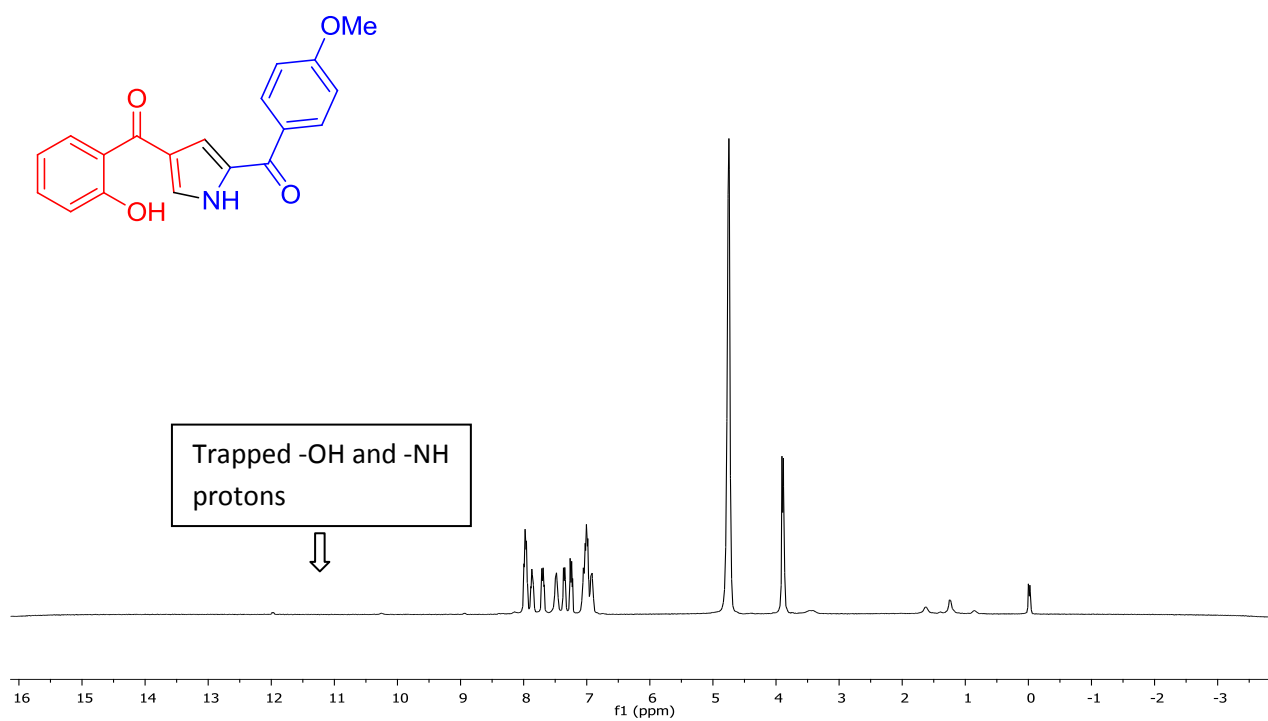

$\text{D}_2\text{O}$  exchange  $^1\text{H}$  NMR (500 MHz,  $\text{DMSO}-d_6$ ) spectrum of **4b**.

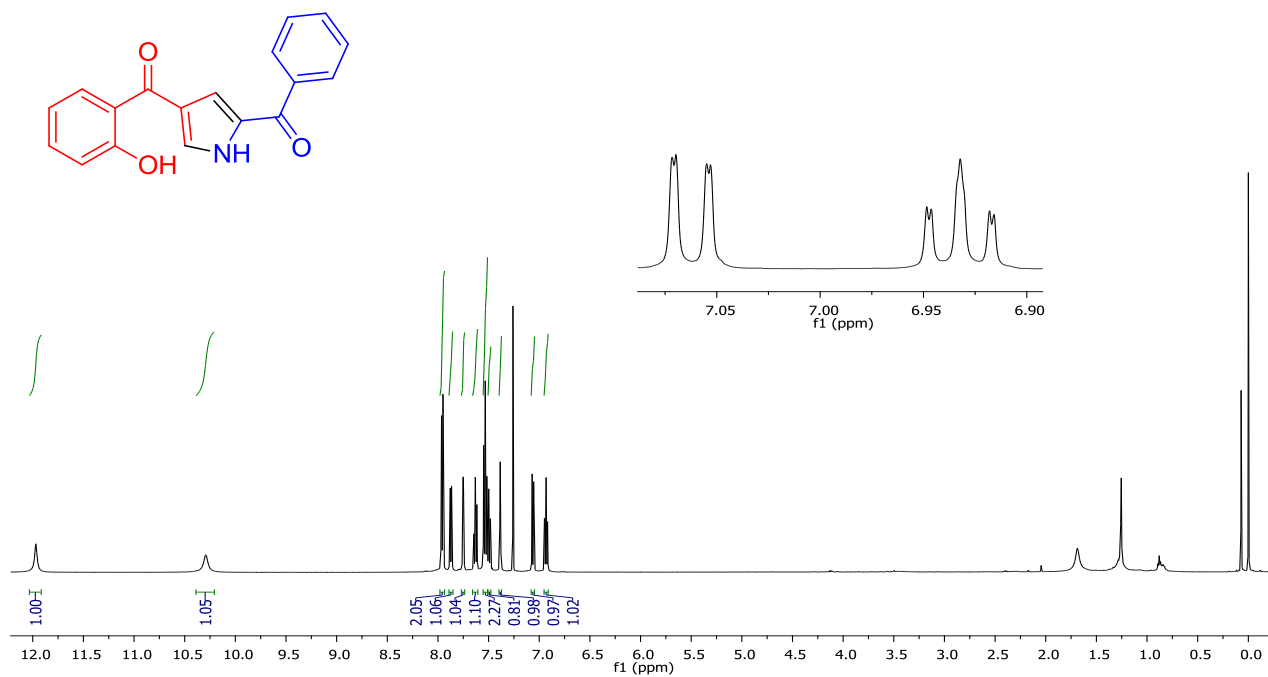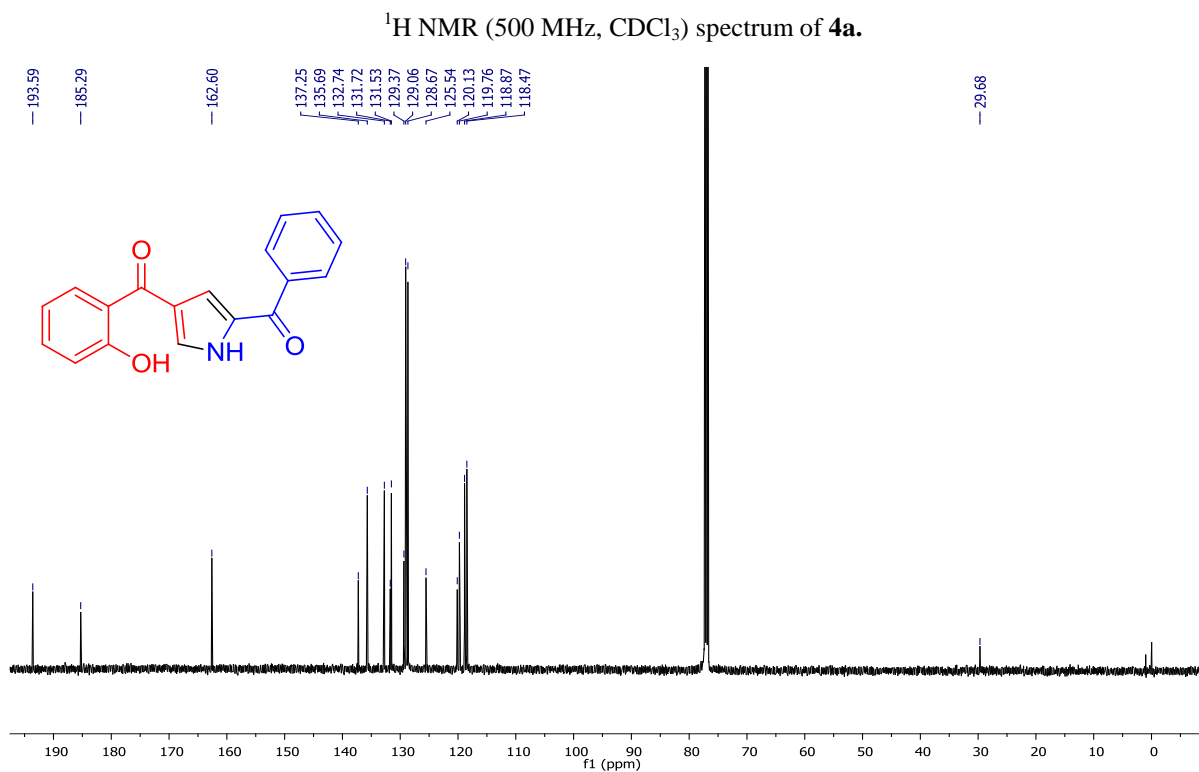

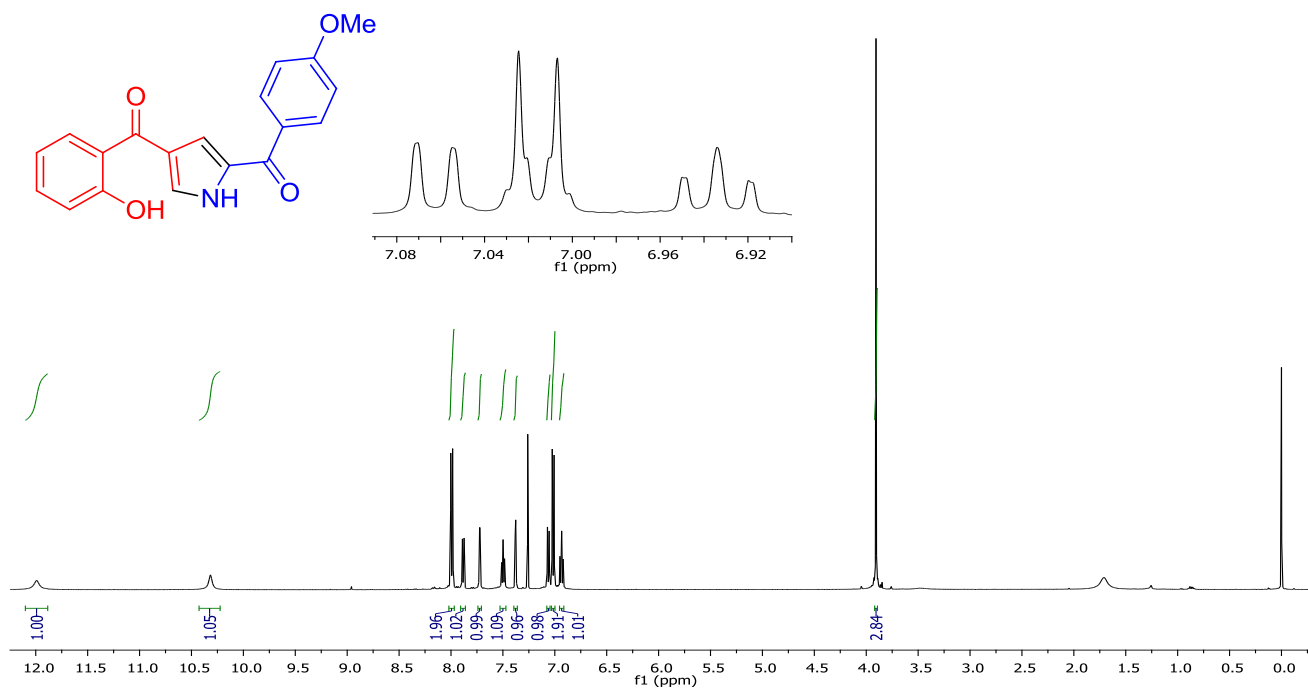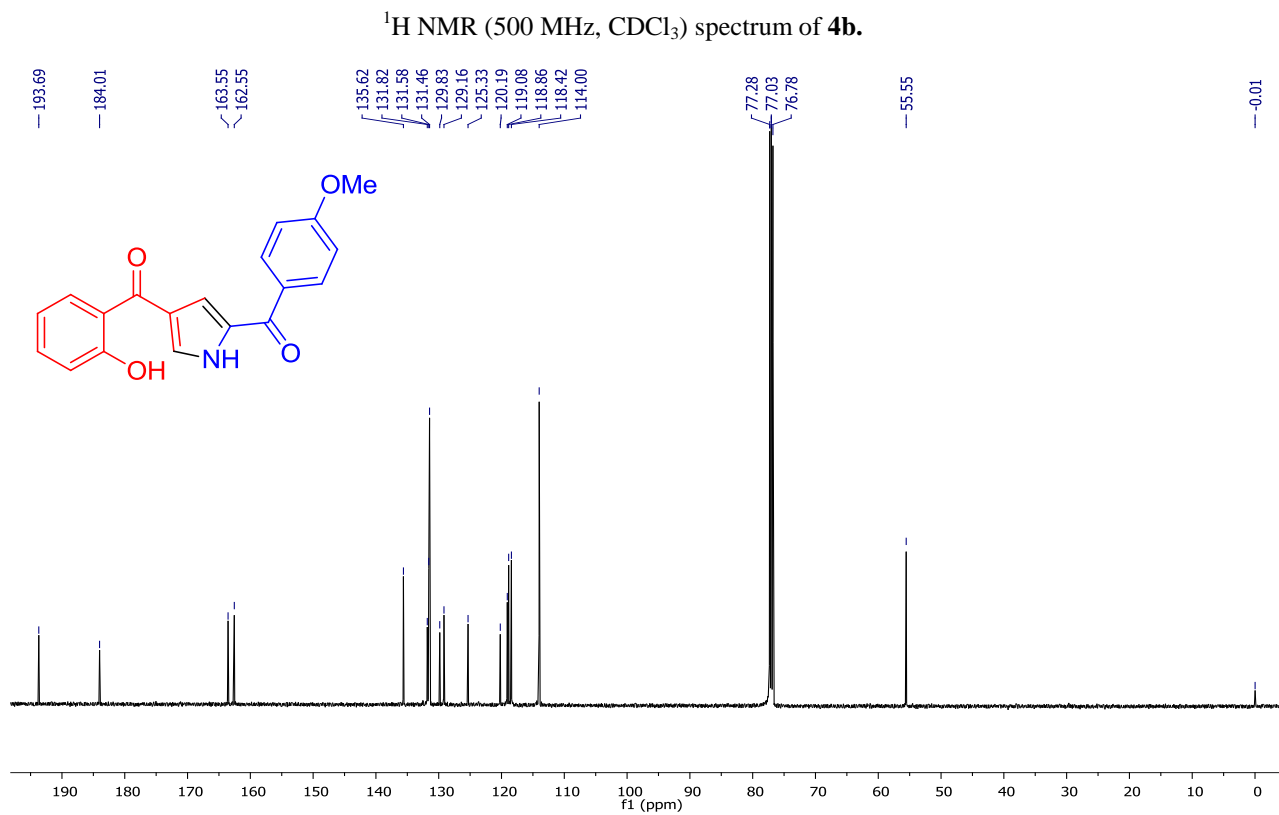

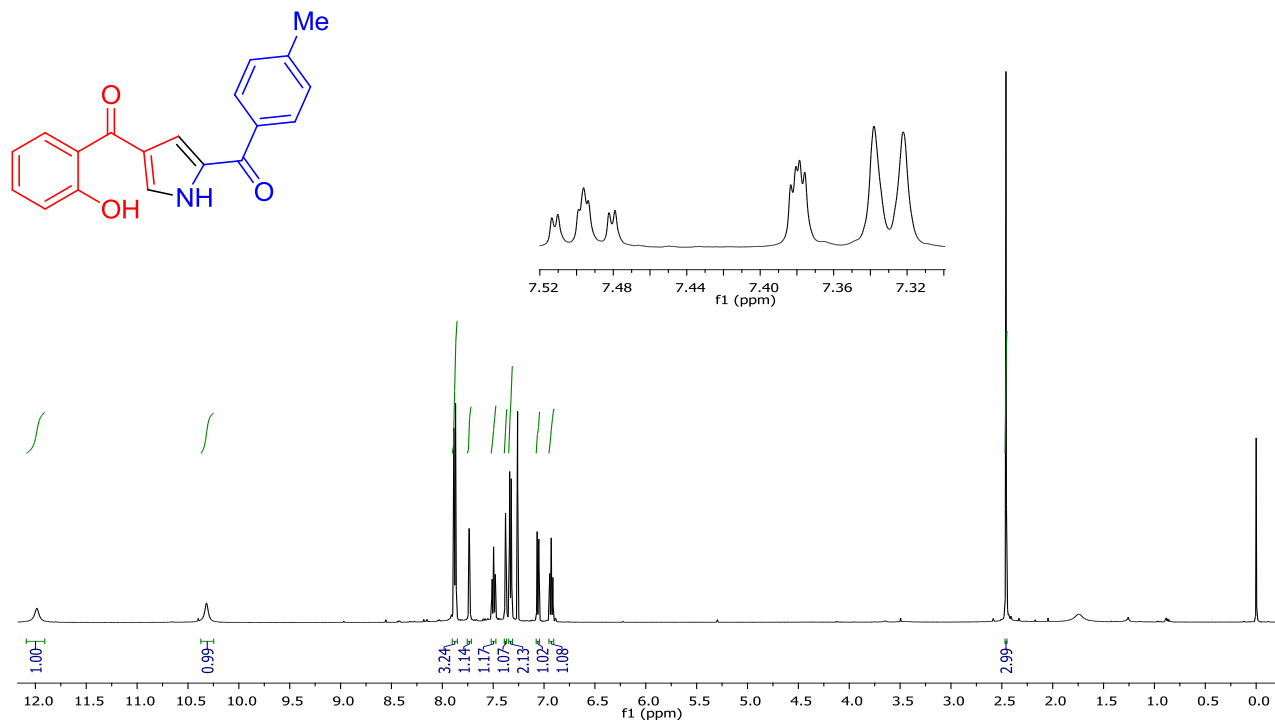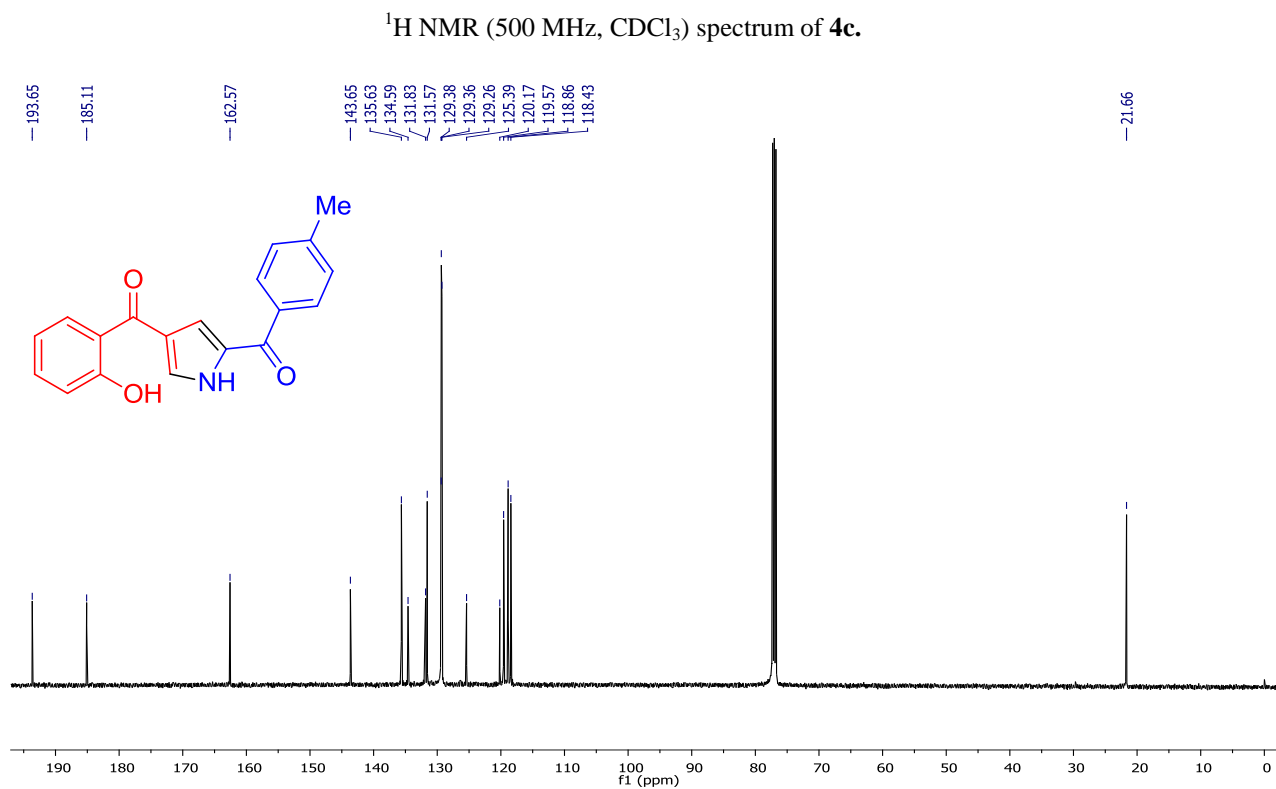

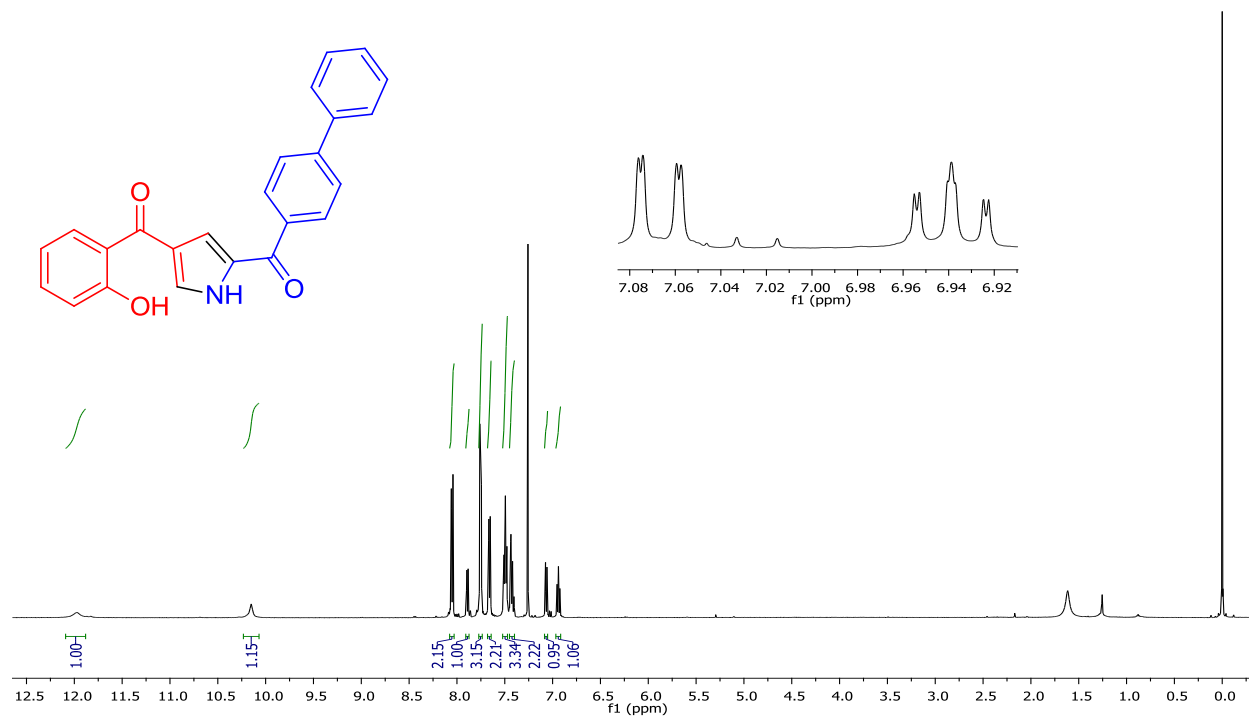

<sup>1</sup>H NMR (500 MHz, CDCl<sub>3</sub>) spectrum of **4d**.

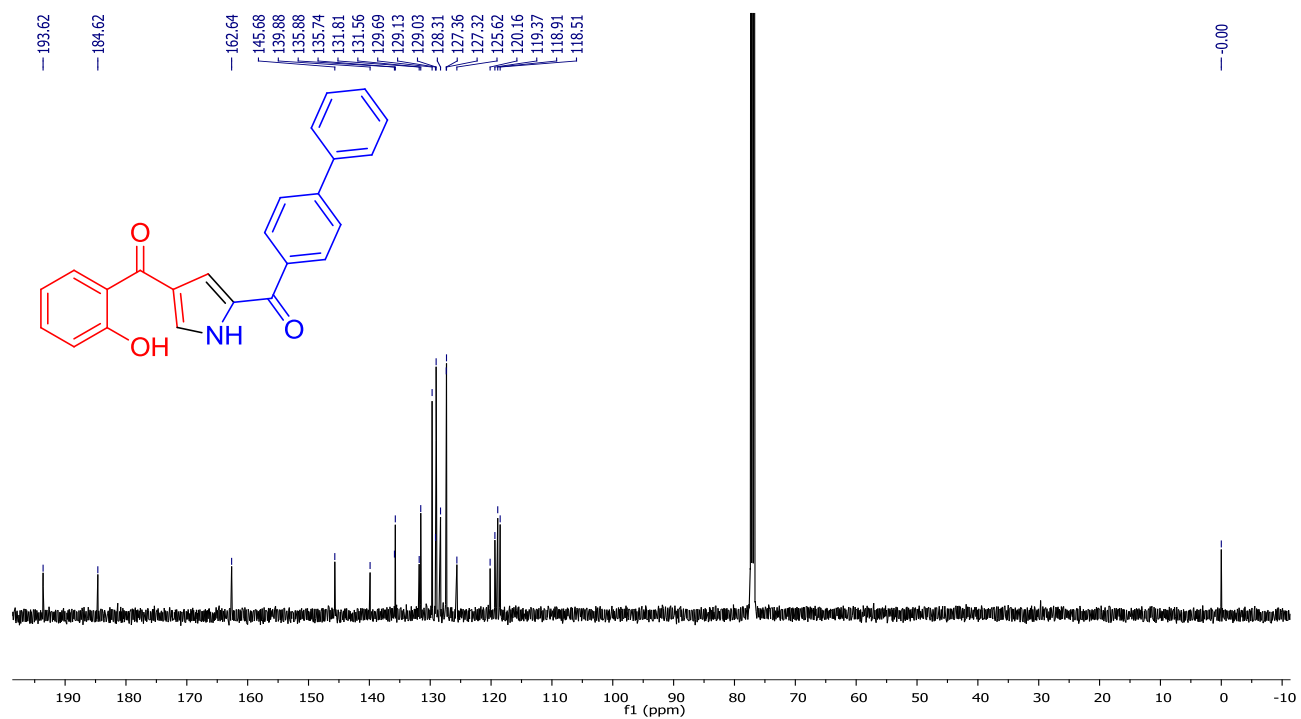

<sup>13</sup>C NMR (125 MHz, CDCl<sub>3</sub>) spectrum of **4d**.

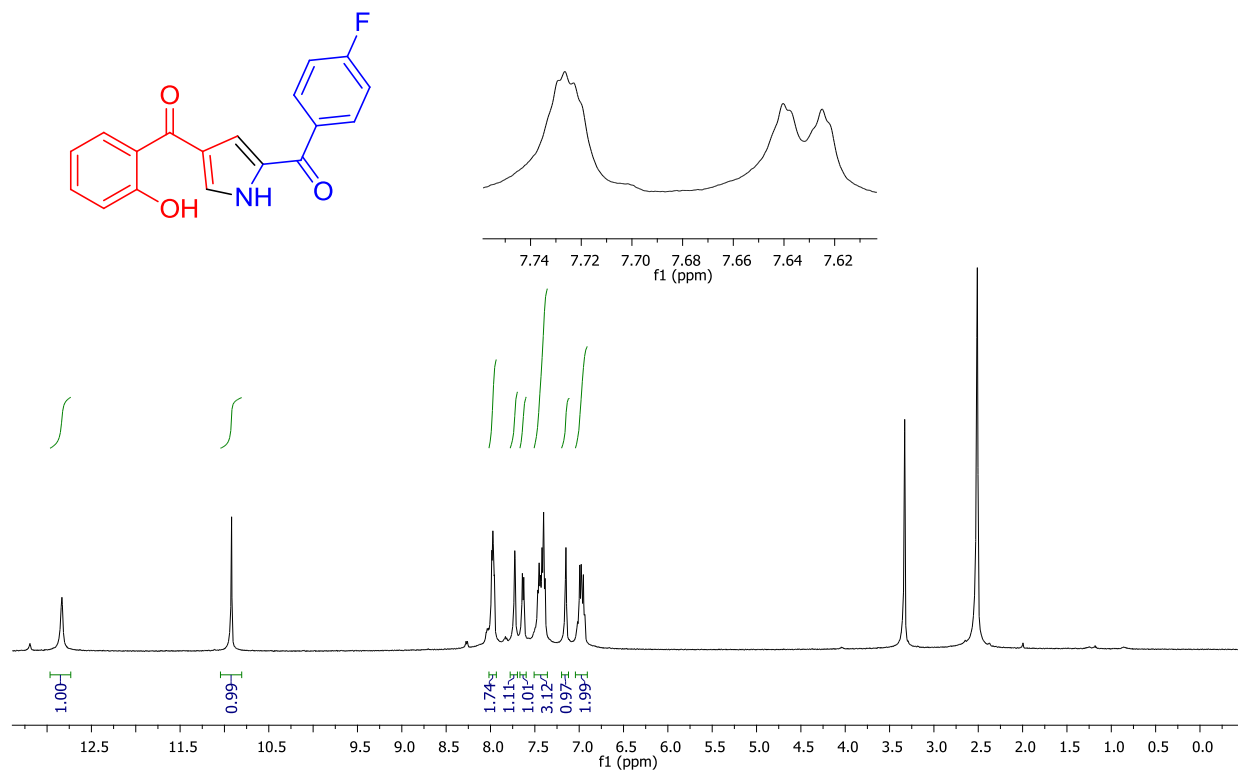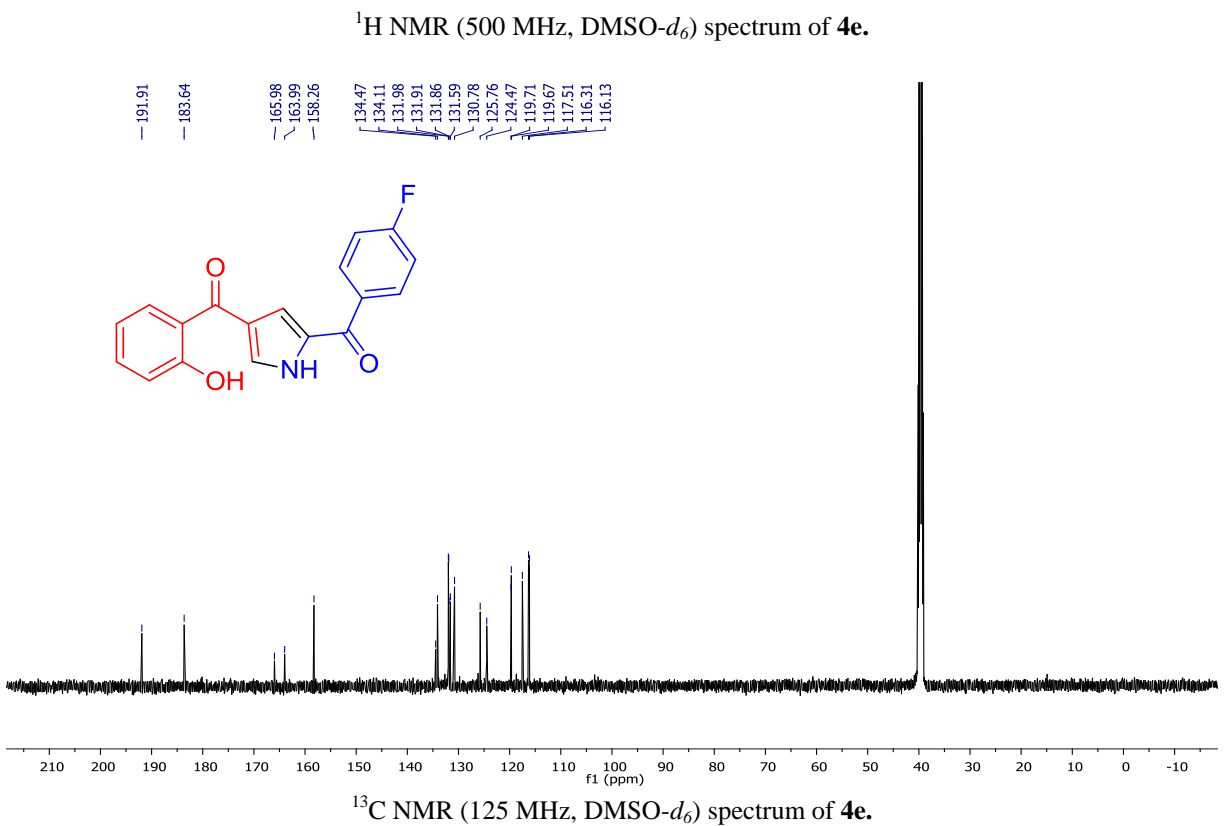

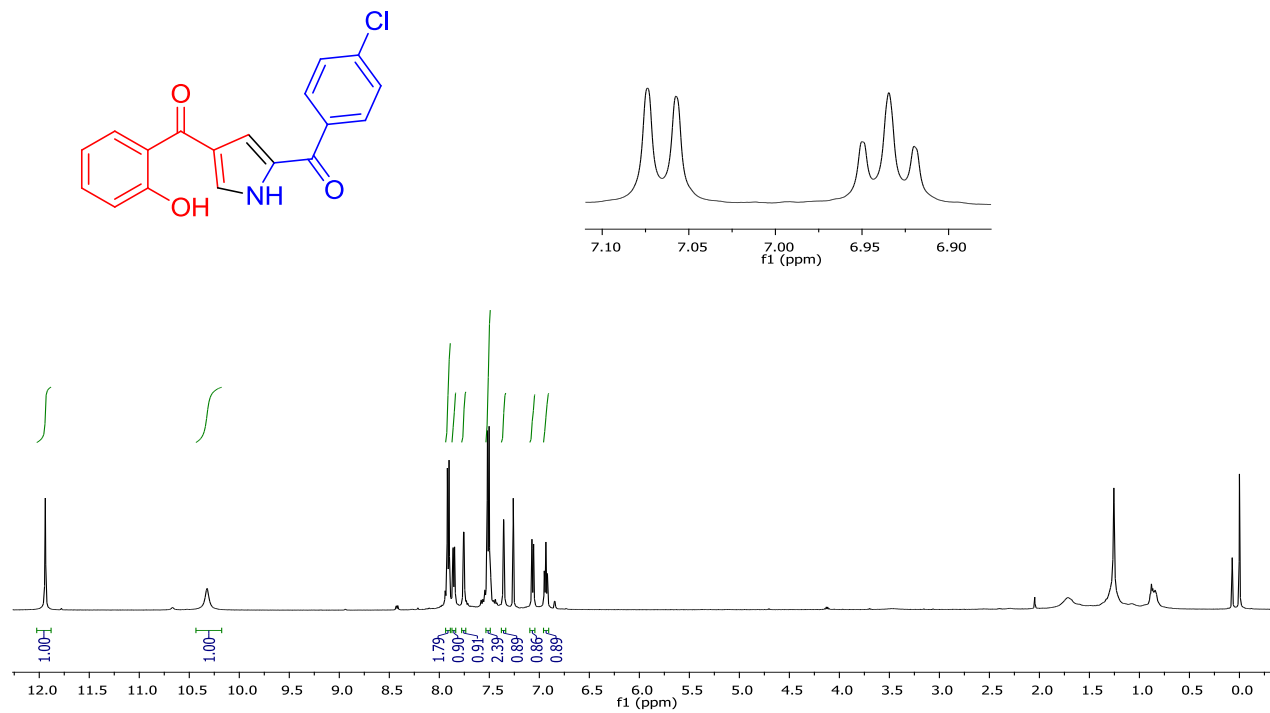

$^1\text{H NMR}$  (500 MHz,  $\text{CDCl}_3$ ) spectrum of **4f**.

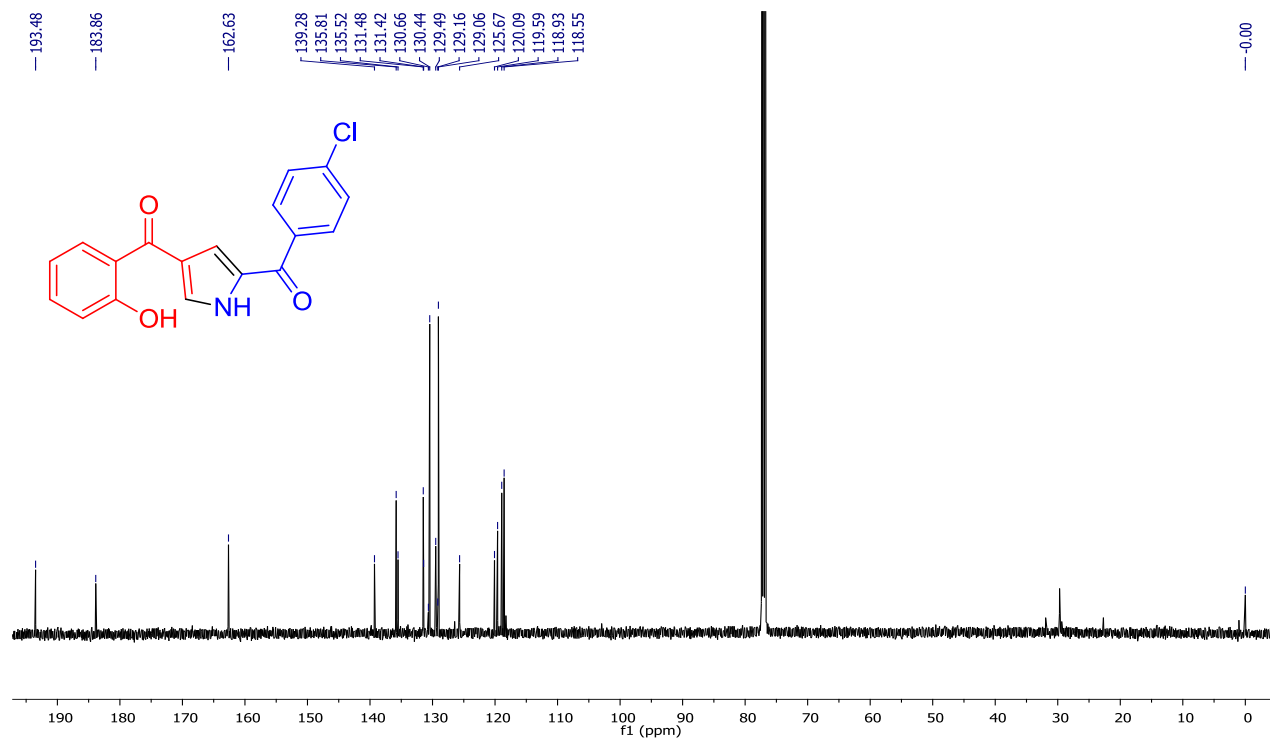

$^{13}\text{C NMR}$  (125 MHz,  $\text{CDCl}_3$ ) spectrum of **4f**.



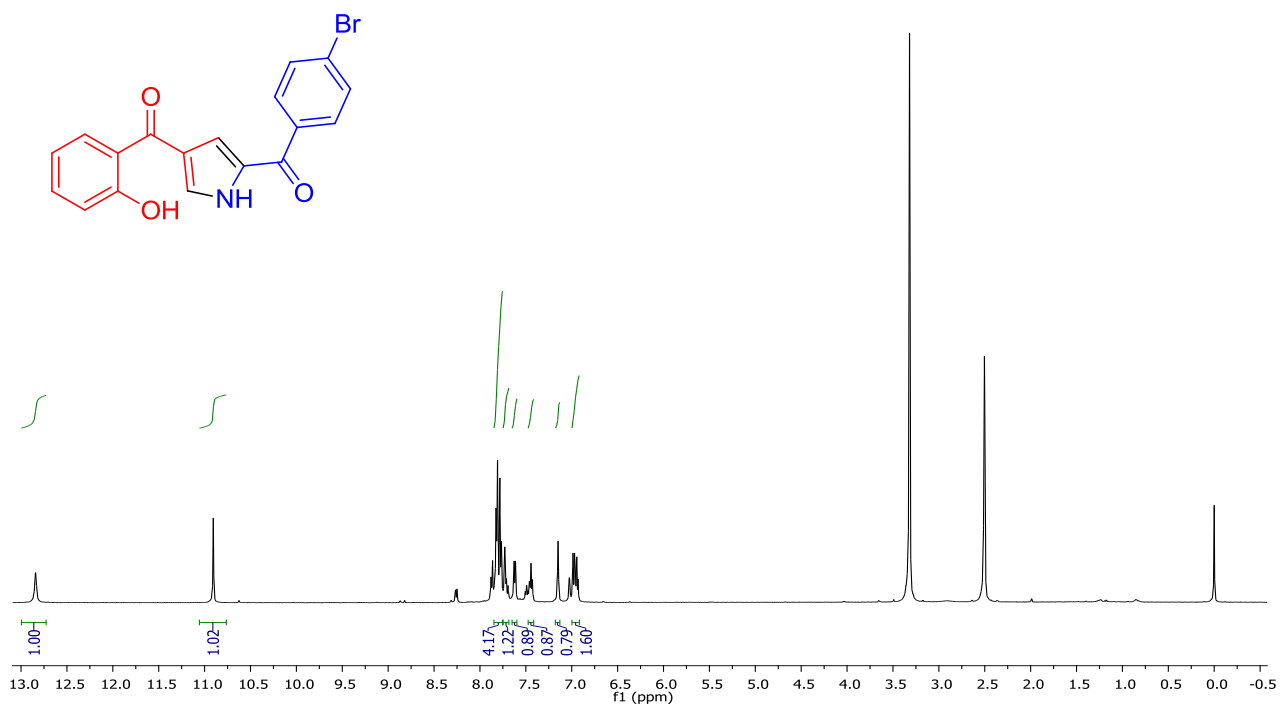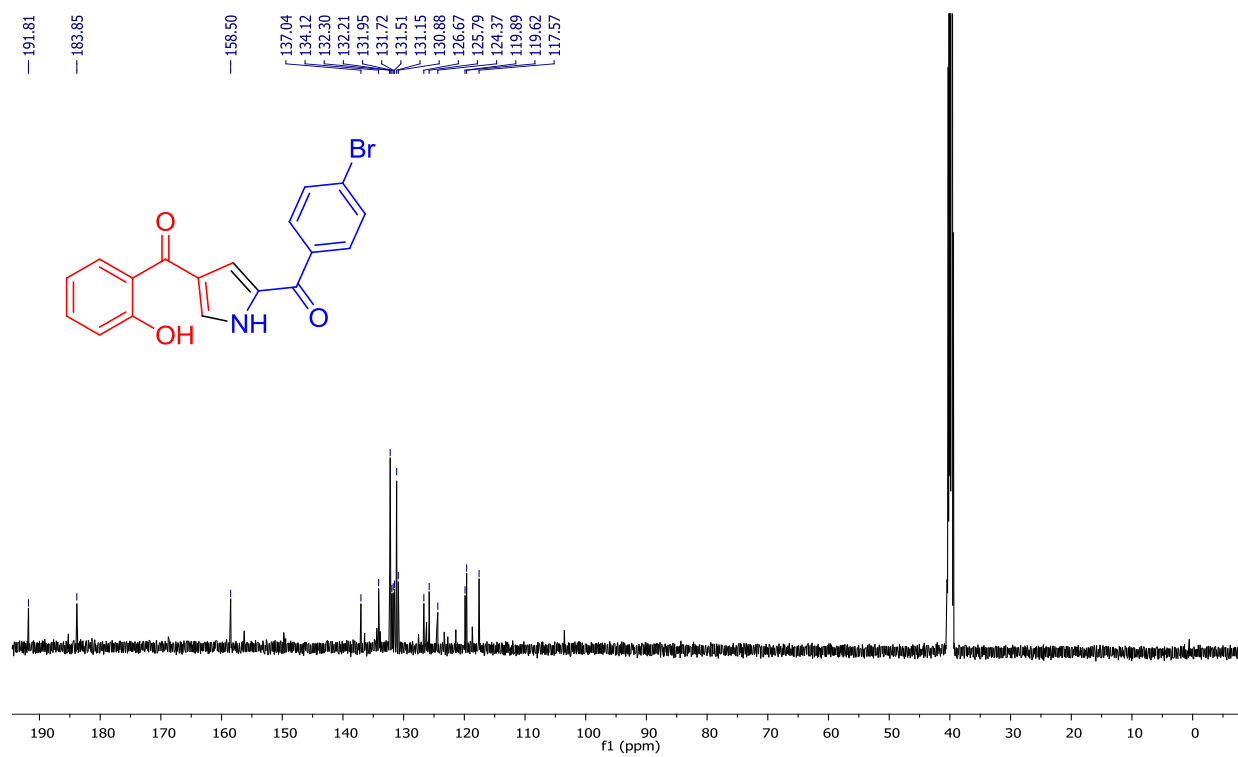

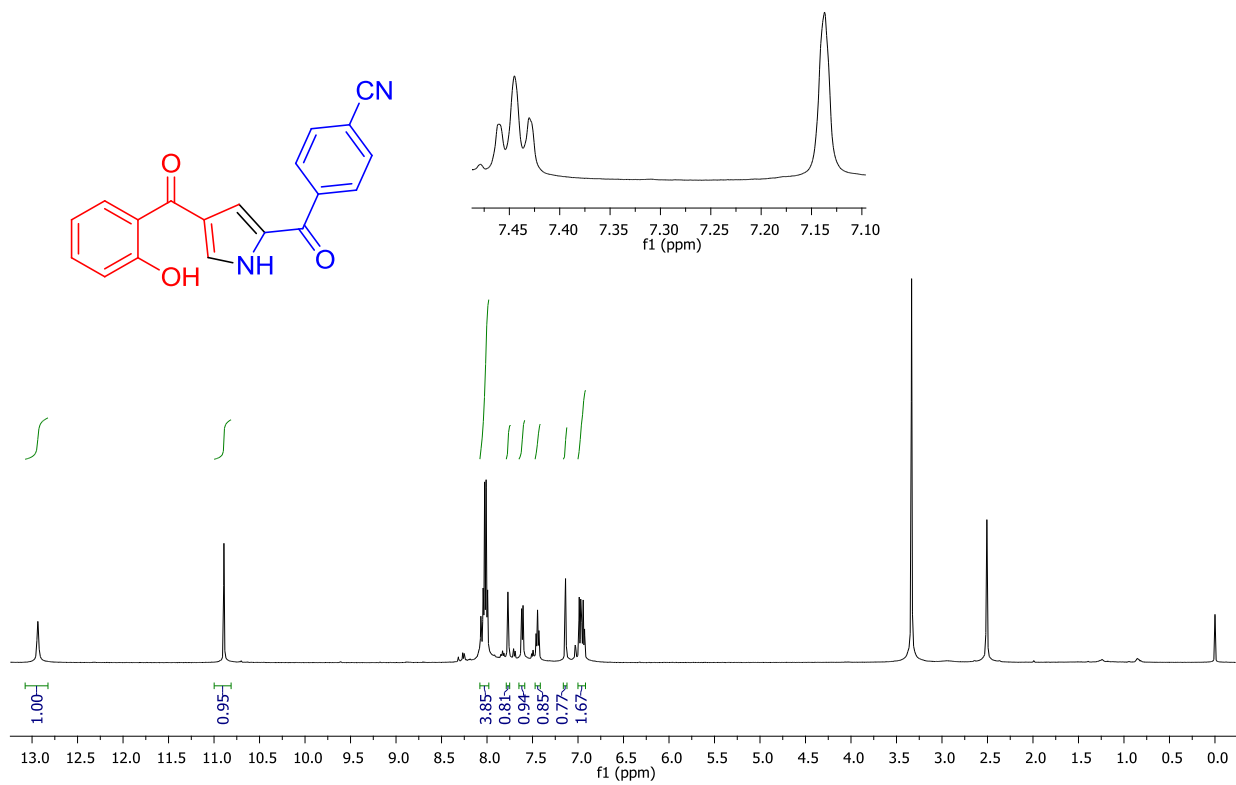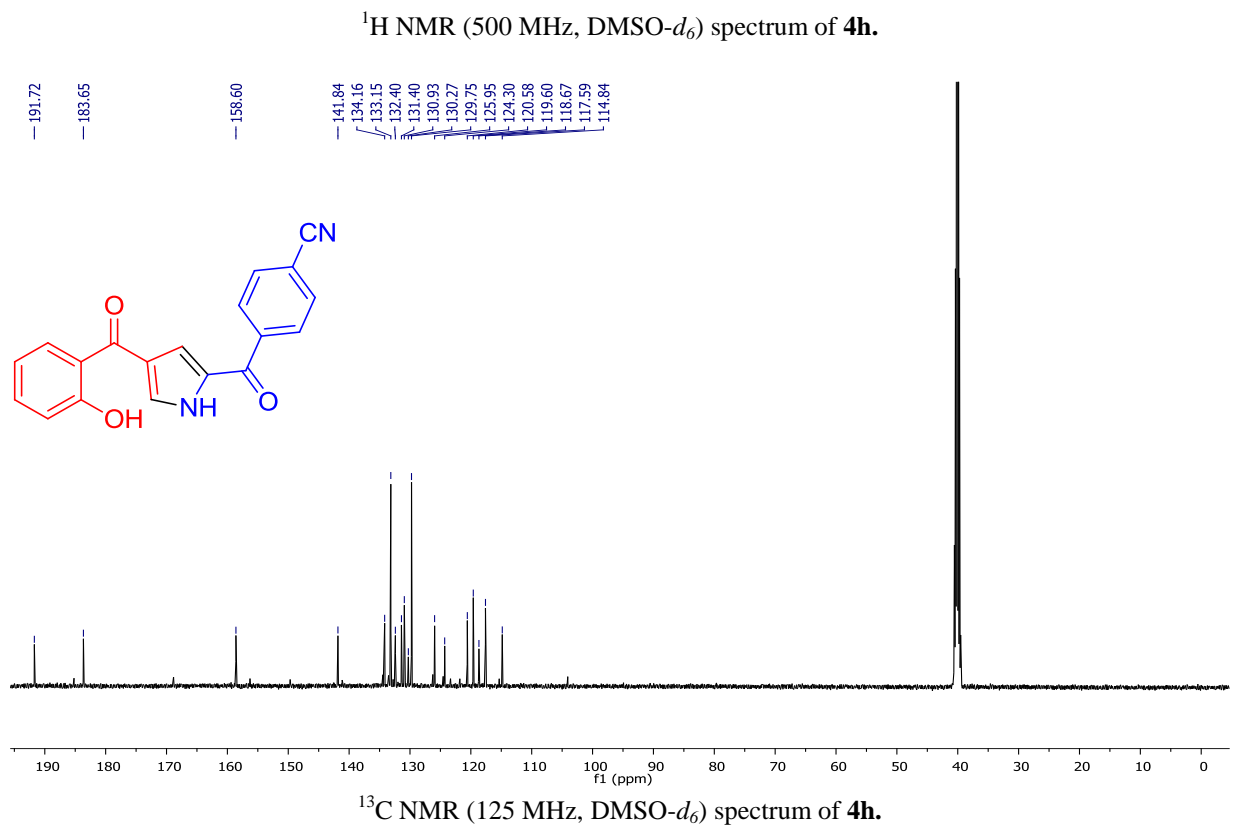

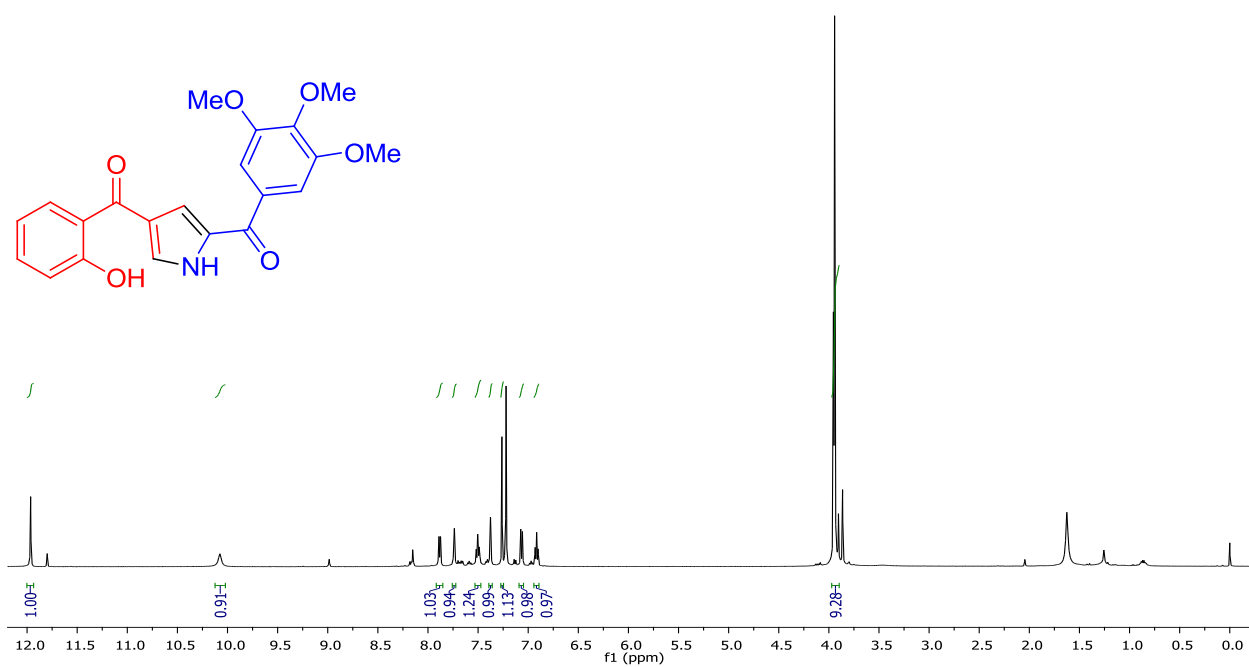

$^1\text{H}$  NMR (500 MHz,  $\text{CDCl}_3$ ) spectrum of **4i**.

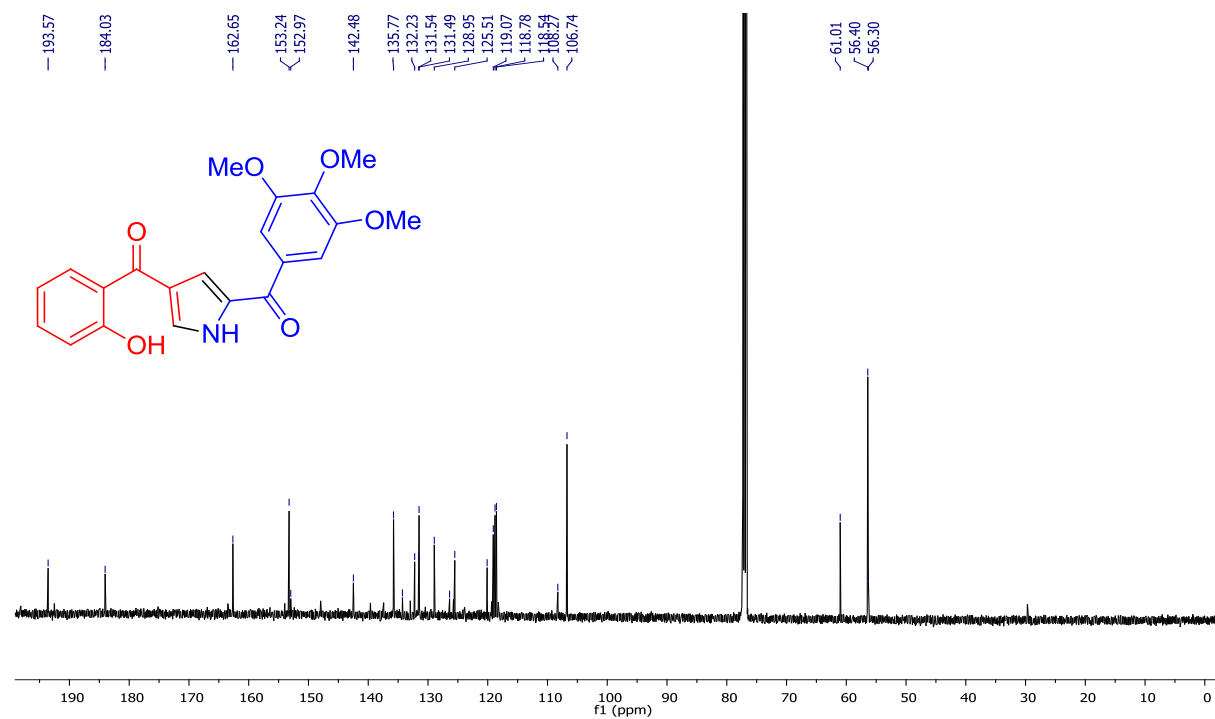

$^{13}\text{C}$  NMR (125 MHz,  $\text{CDCl}_3$ ) spectrum of **4i**.

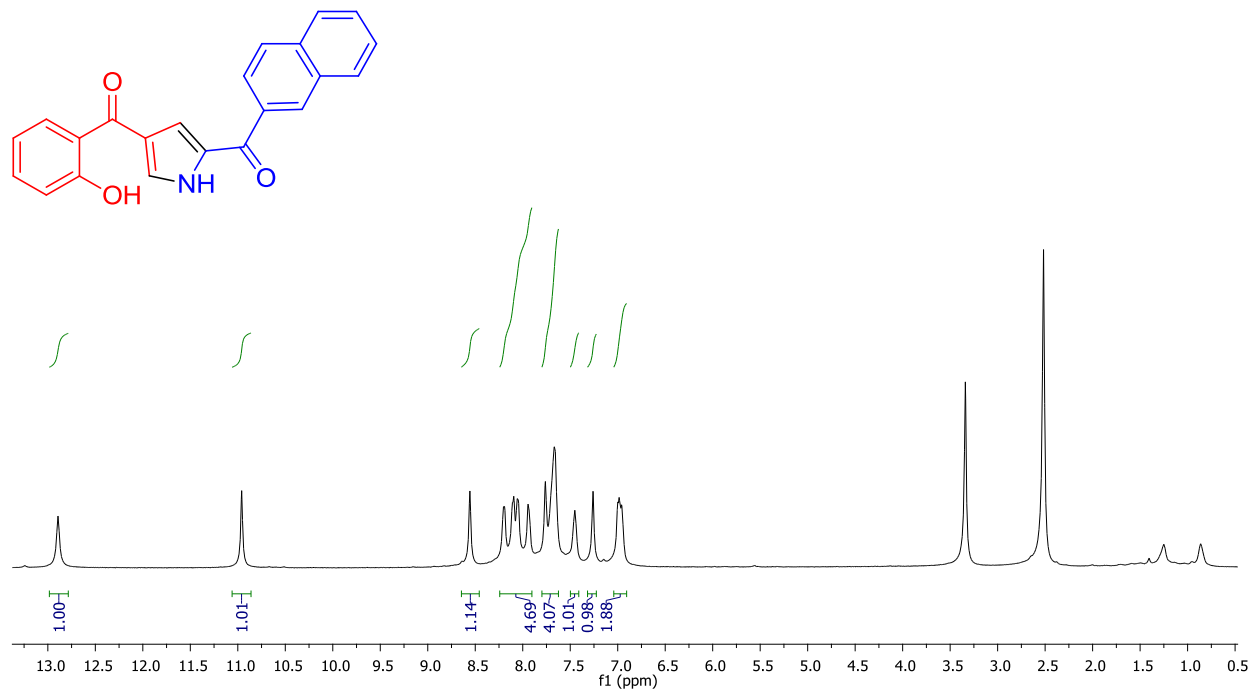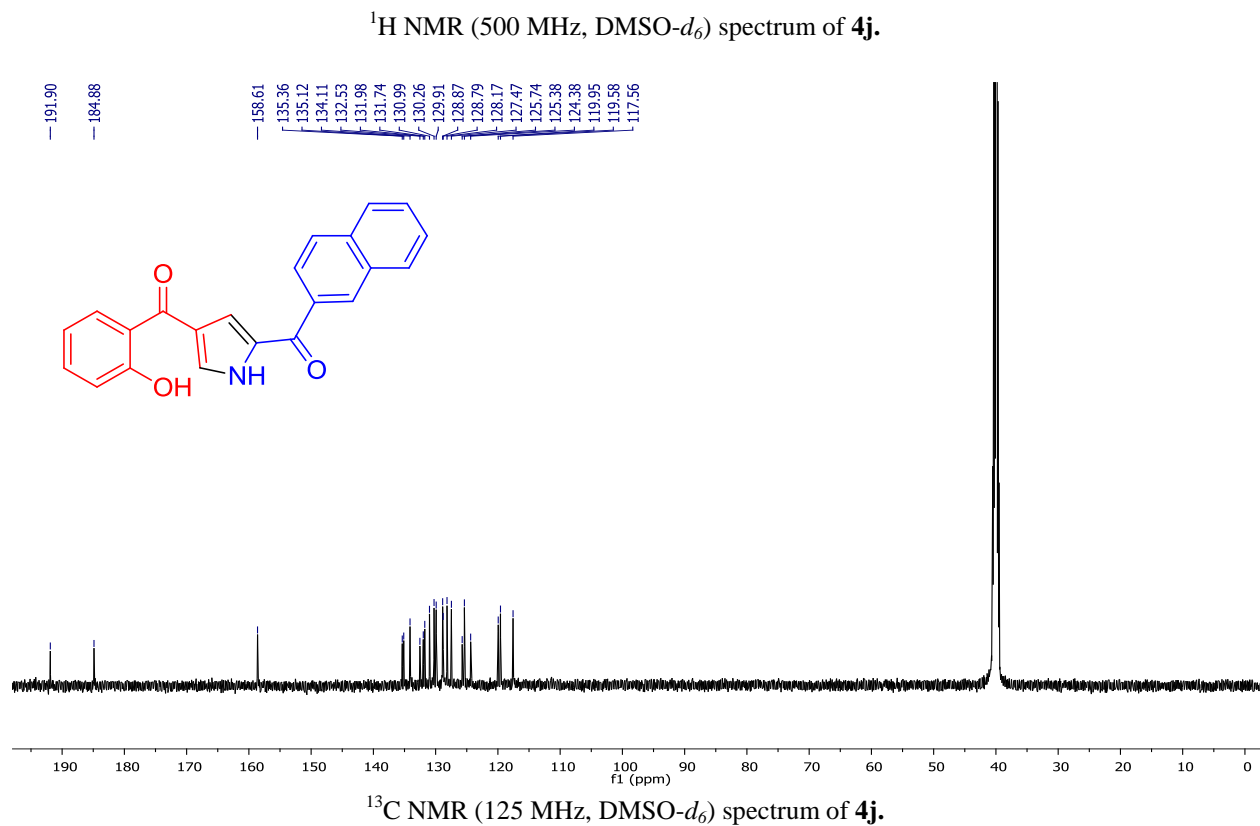

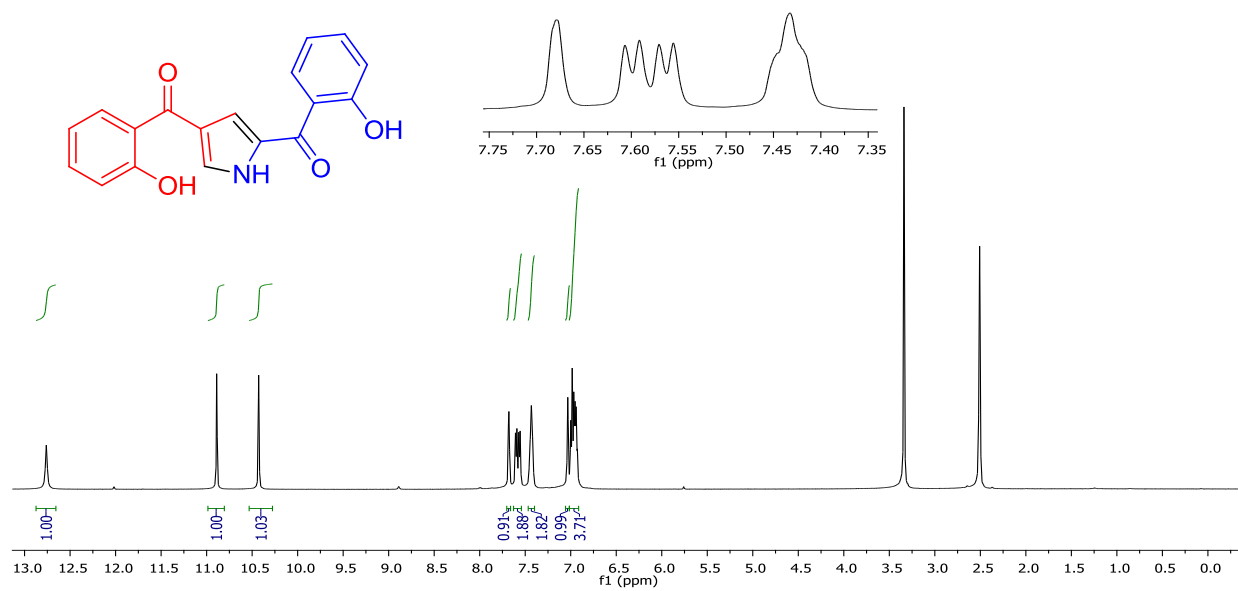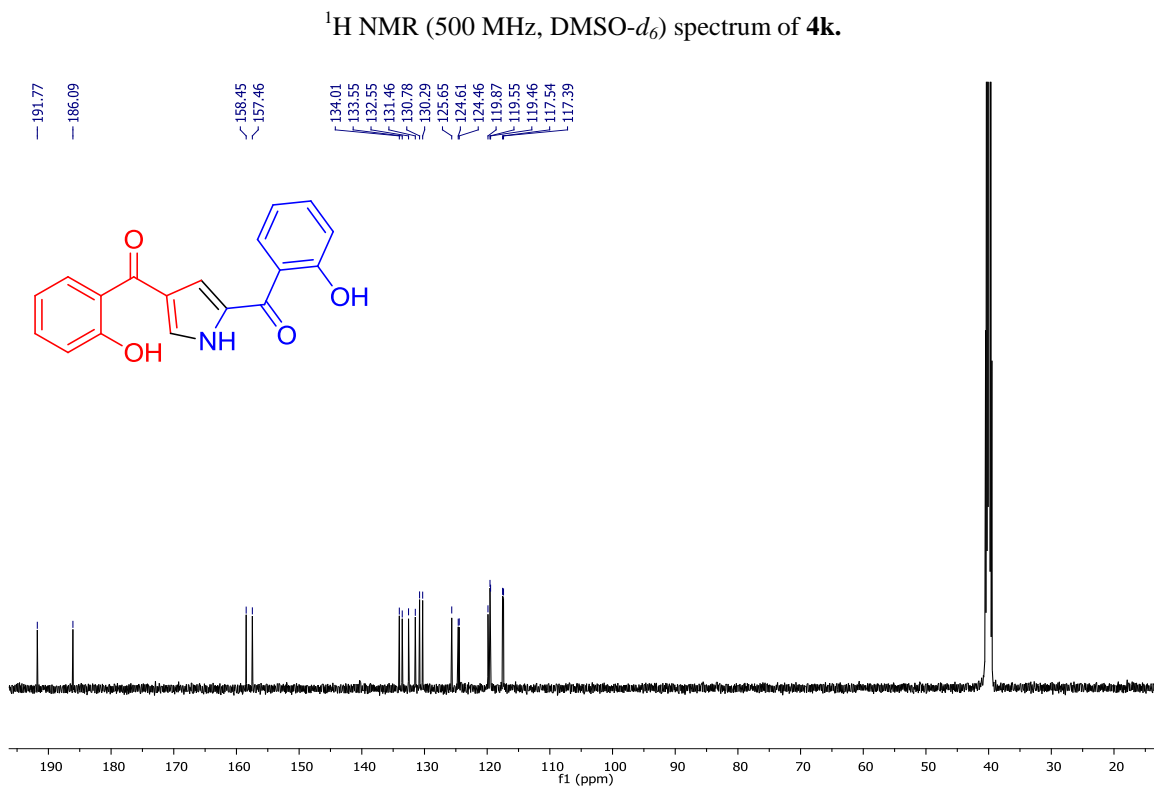

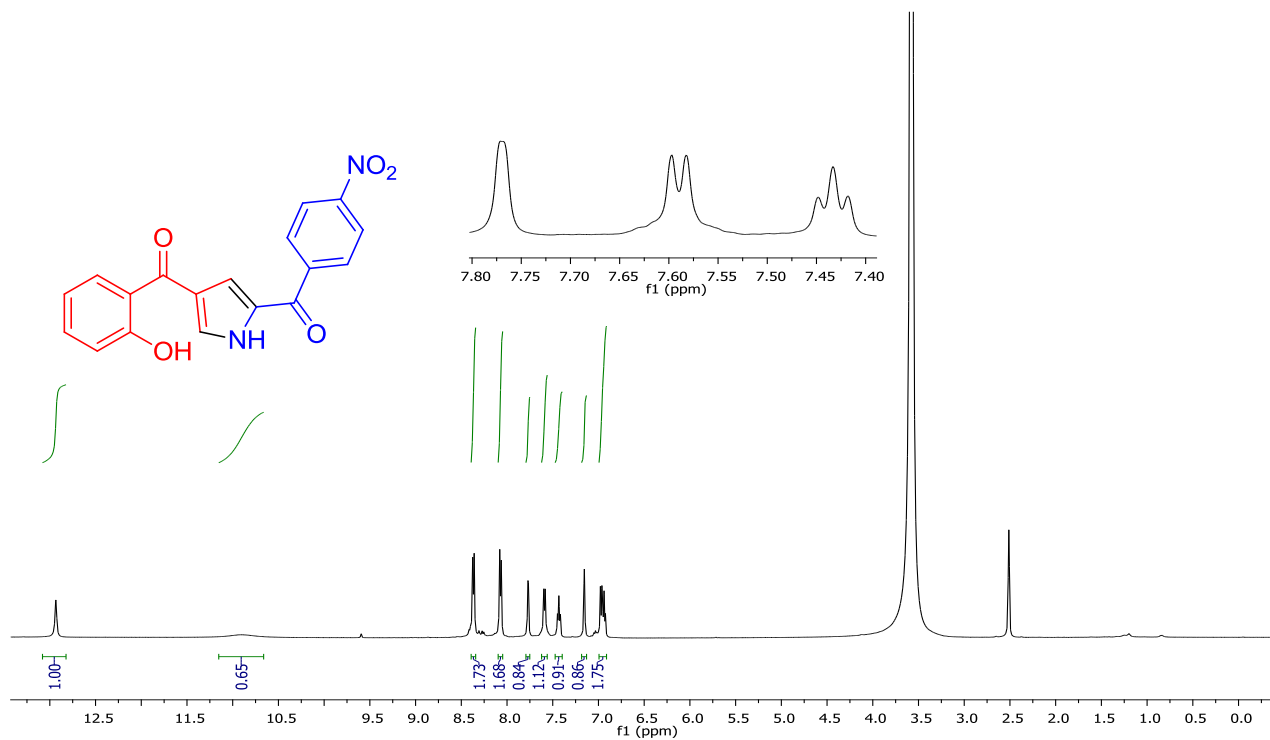

$^1\text{H NMR}$  (500 MHz,  $\text{DMSO-}d_6$ ) spectrum of **4I**.

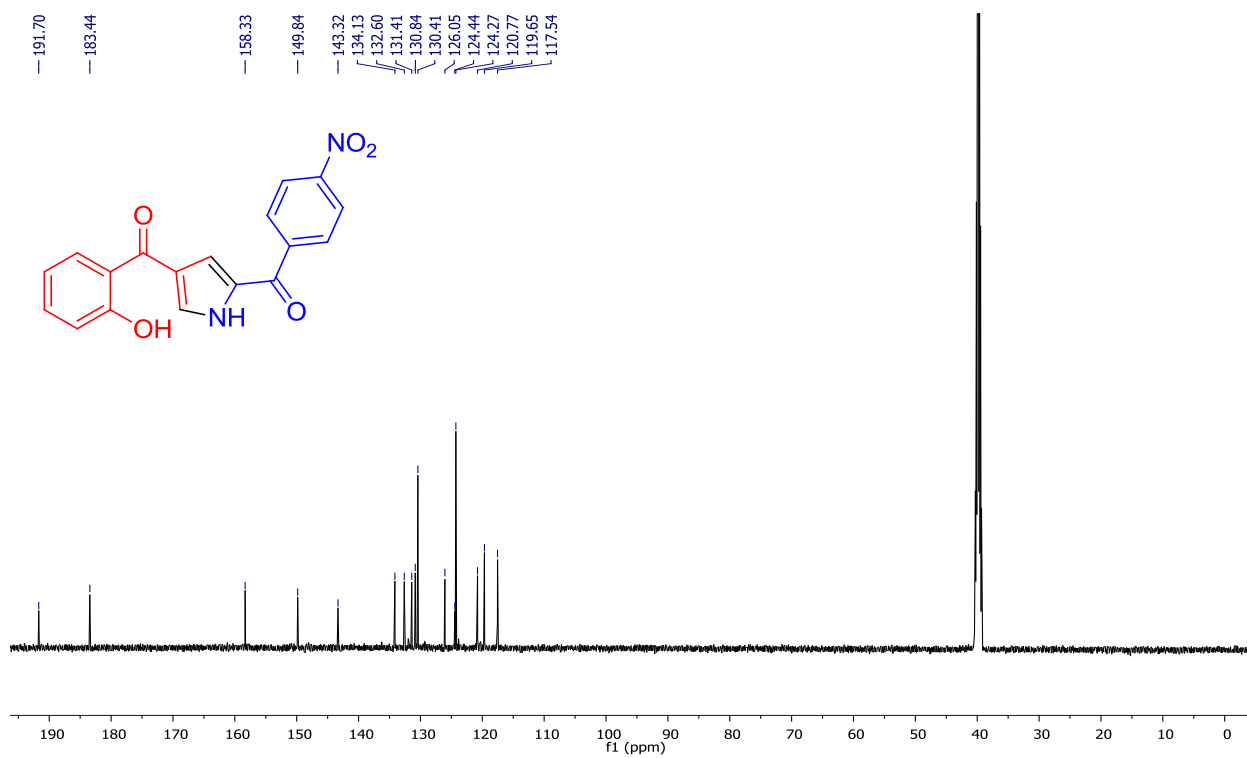

$^{13}\text{C NMR}$  (125 MHz,  $\text{DMSO-}d_6$ ) spectrum of **4I**.

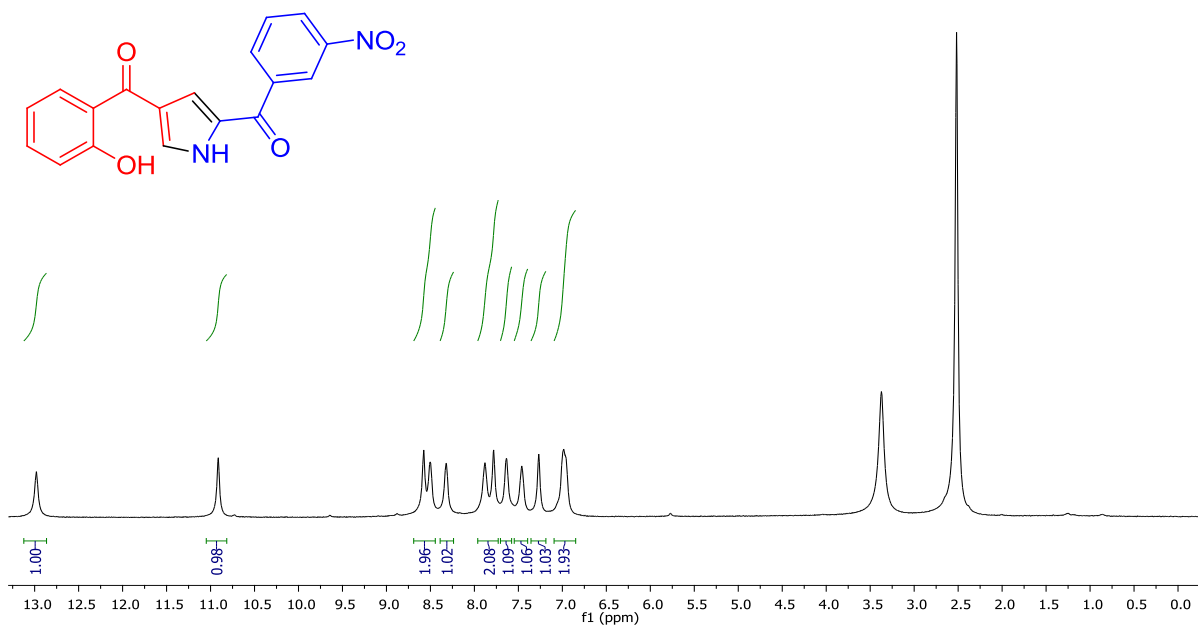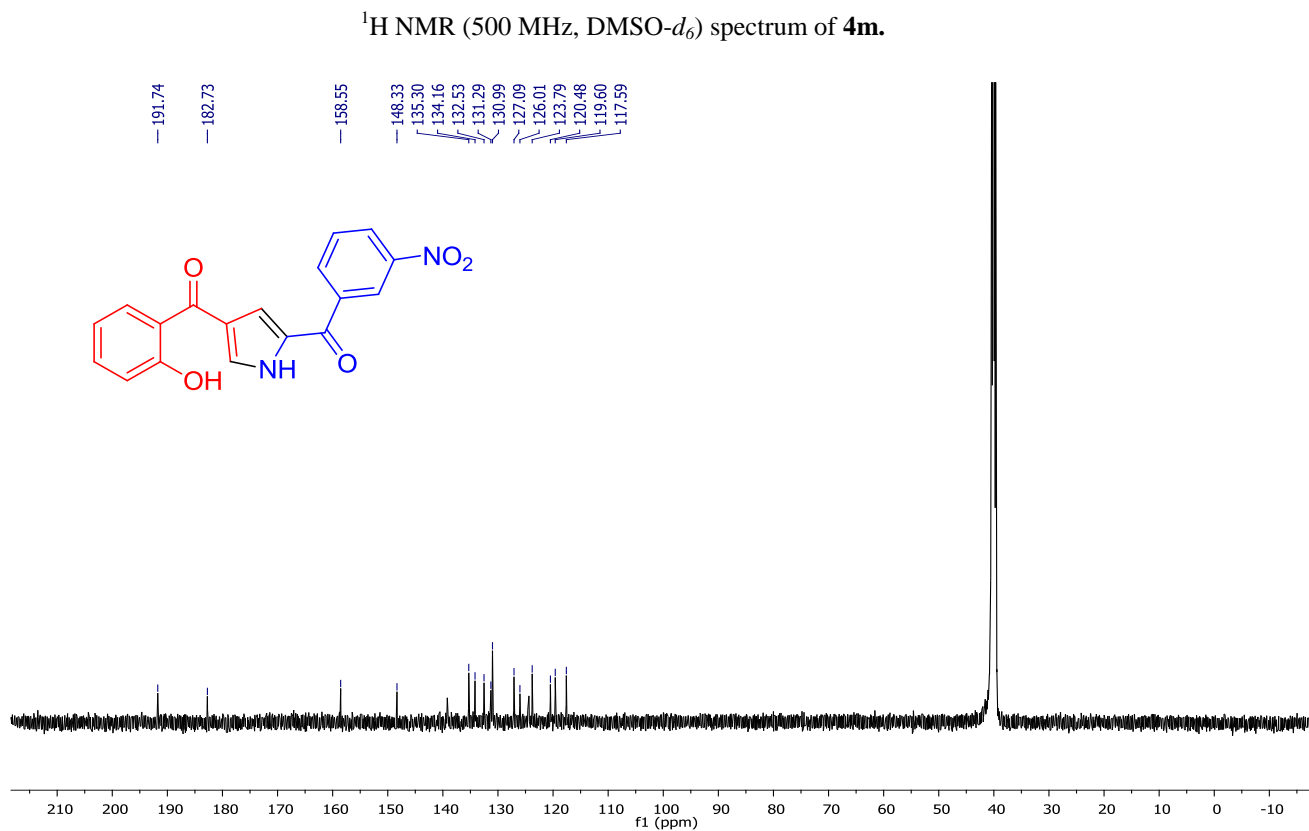

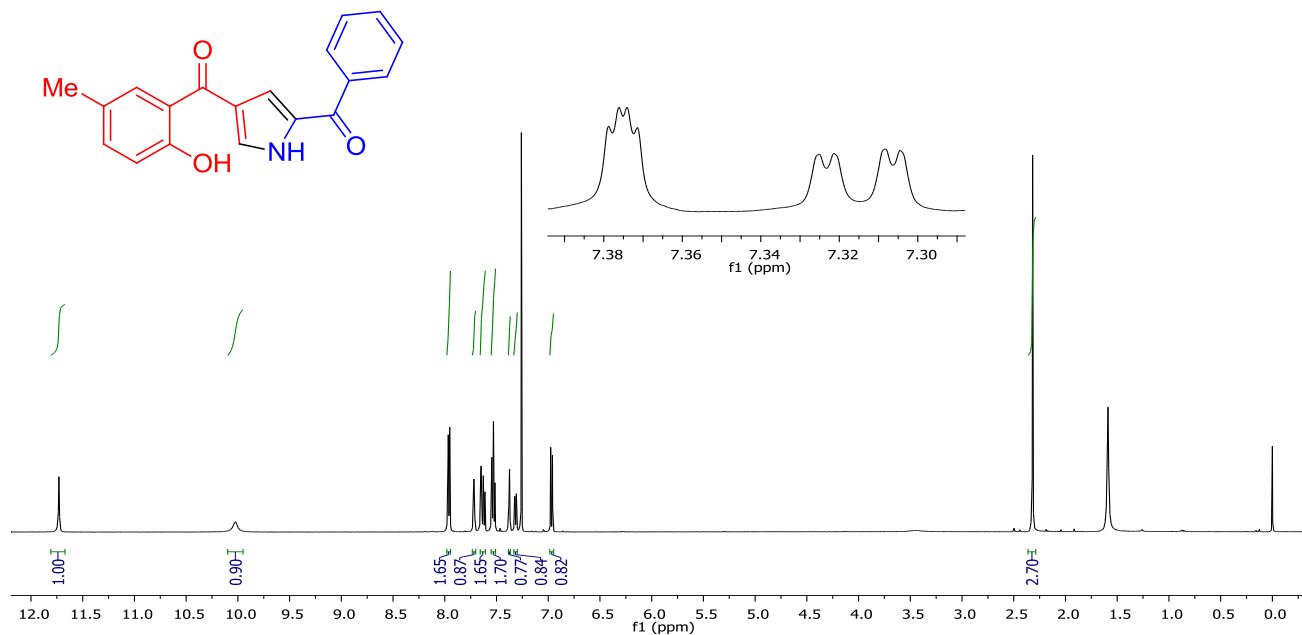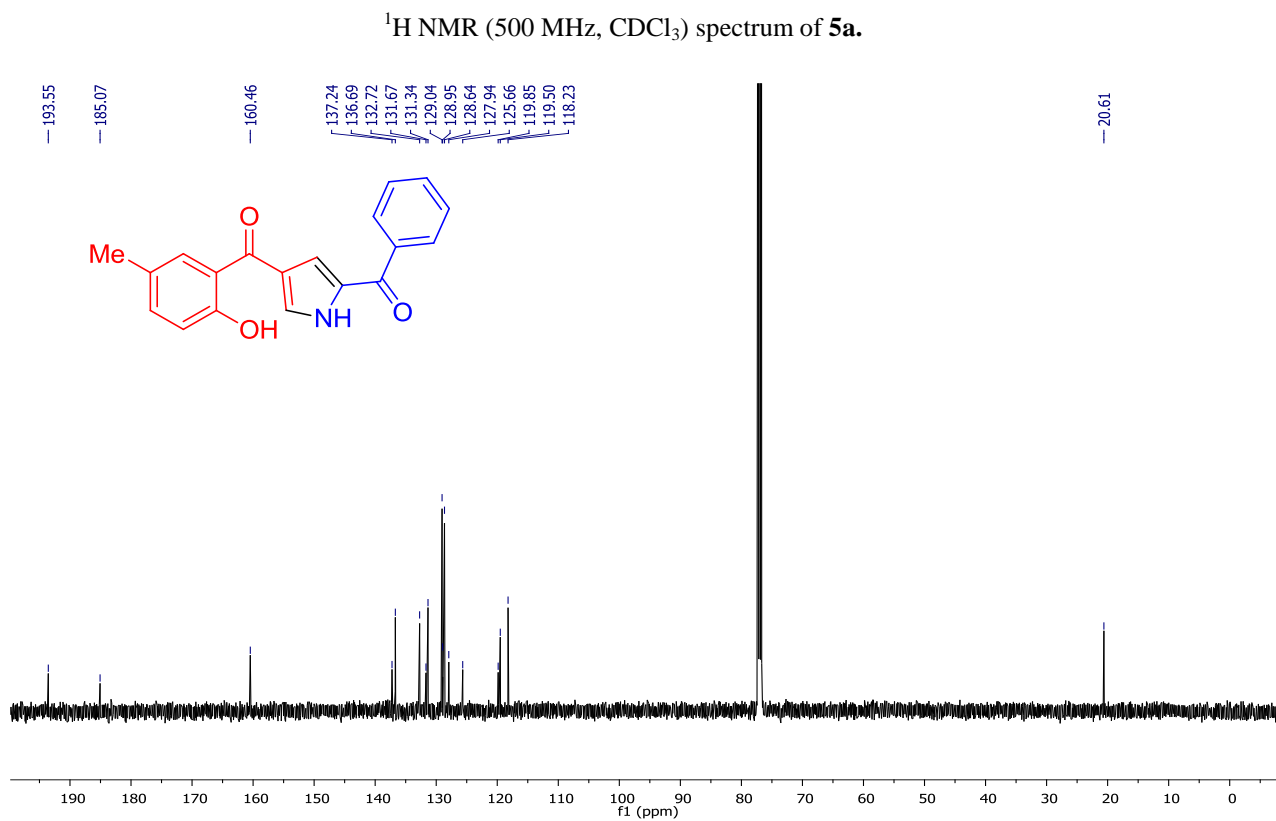



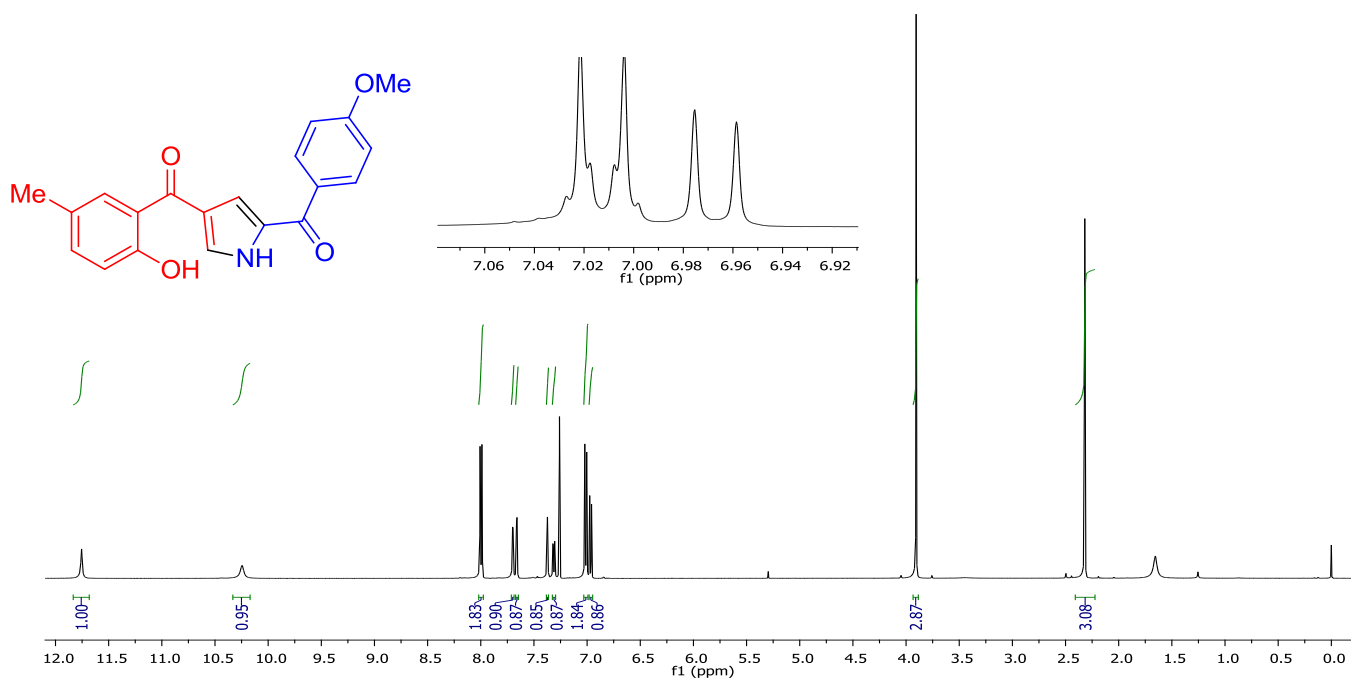

$^1\text{H}$  NMR (500 MHz,  $\text{CDCl}_3$ ) spectrum of **5b**.

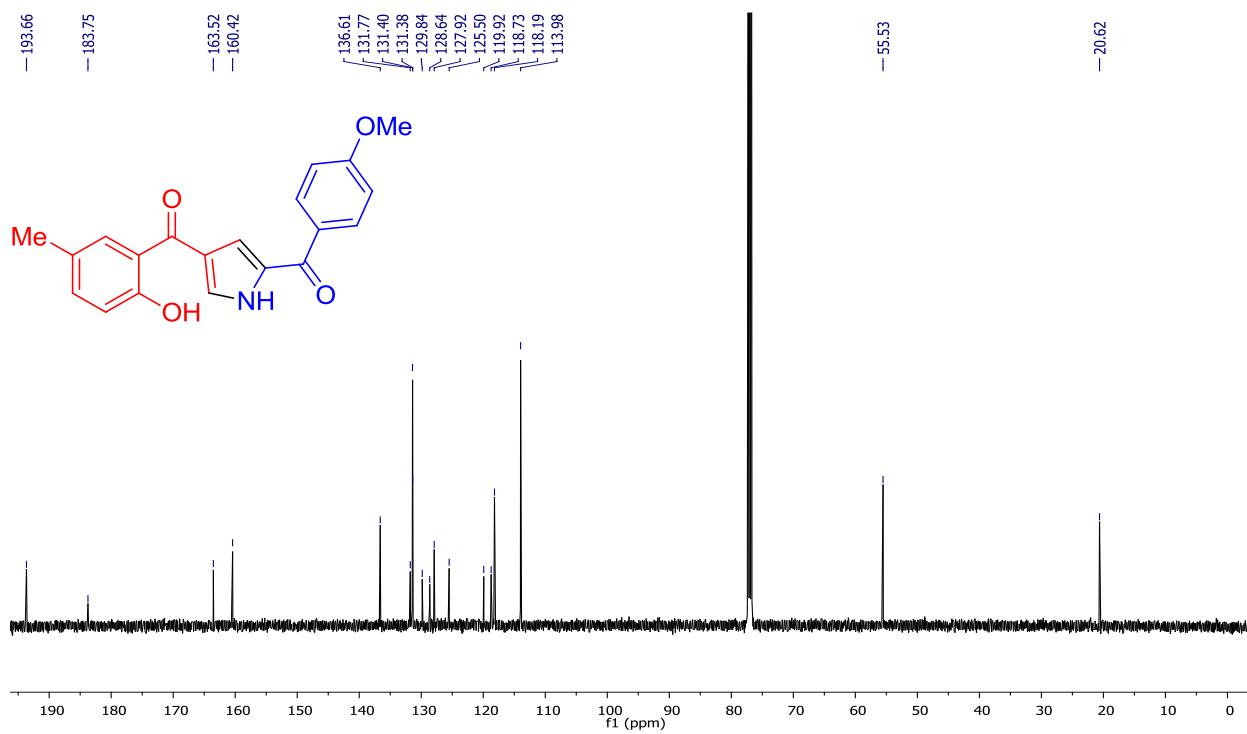

$^{13}\text{C}$  NMR (125 MHz,  $\text{CDCl}_3$ ) spectrum of **5b**.

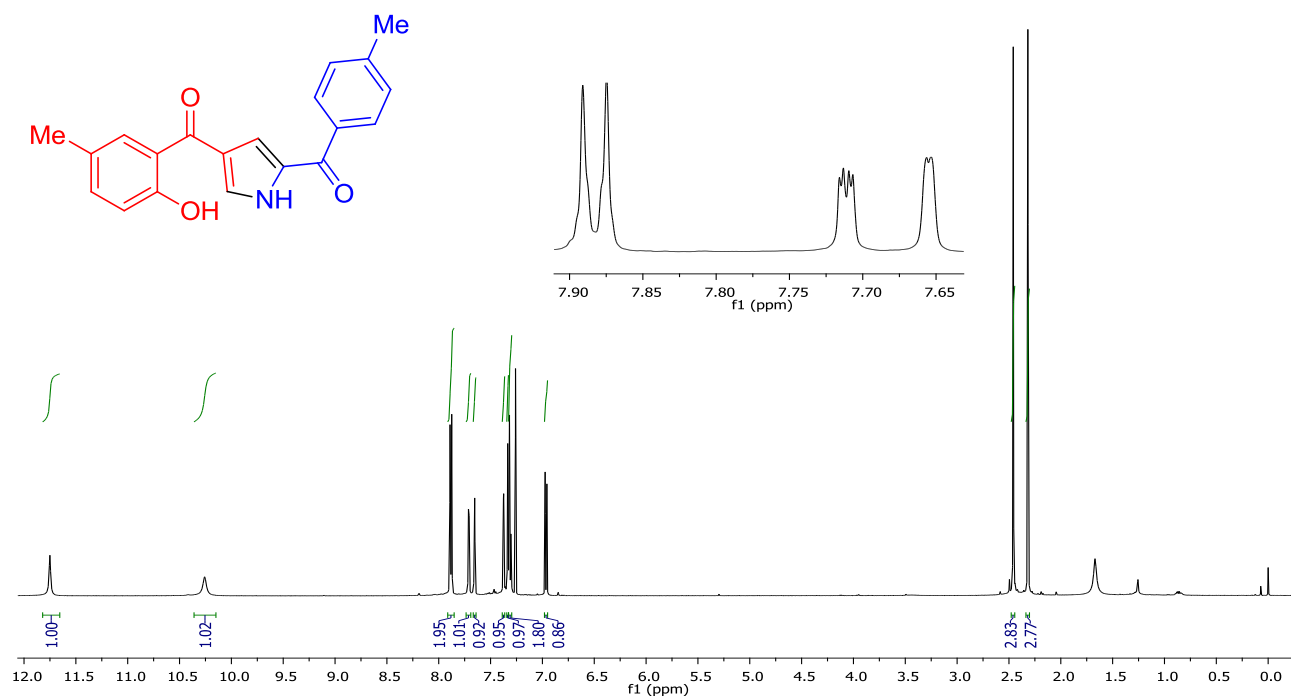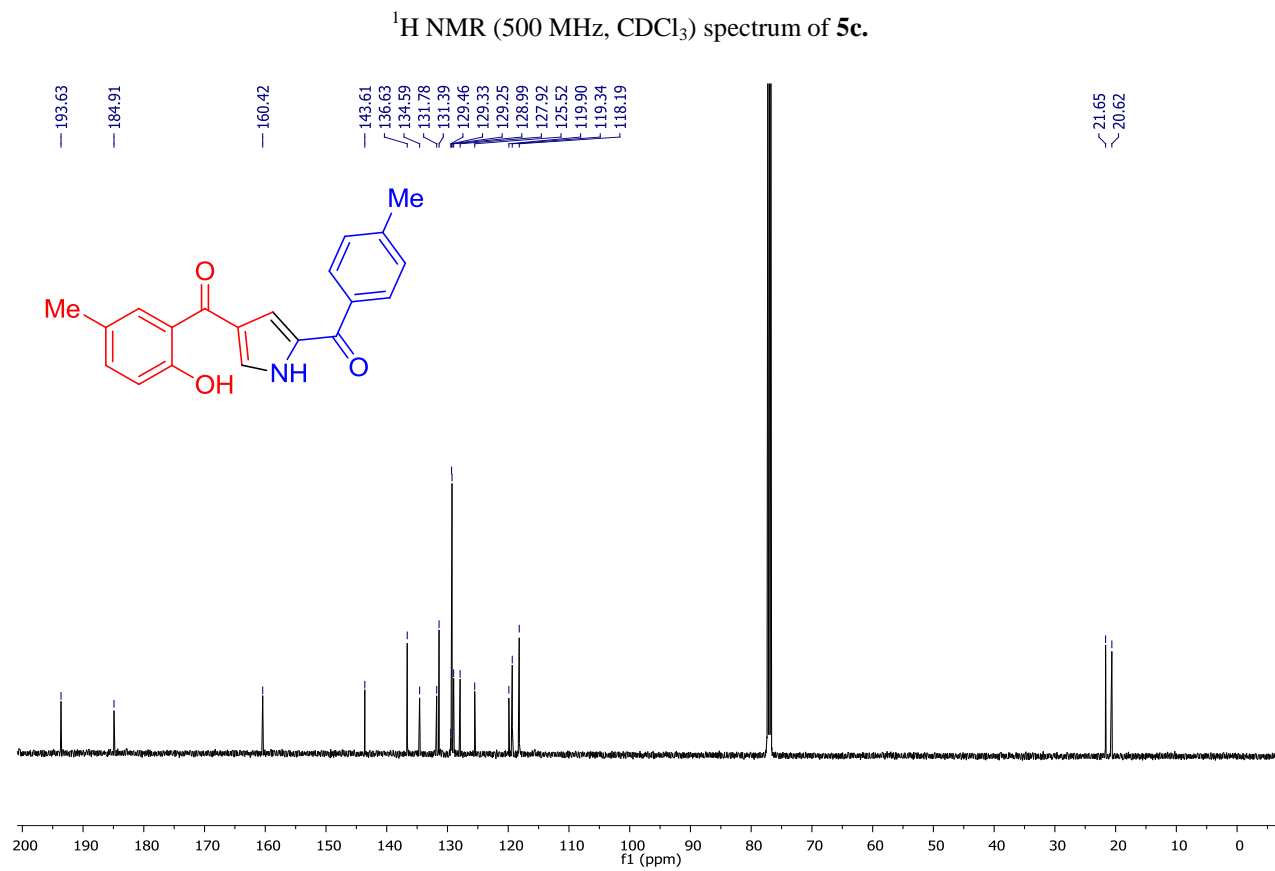

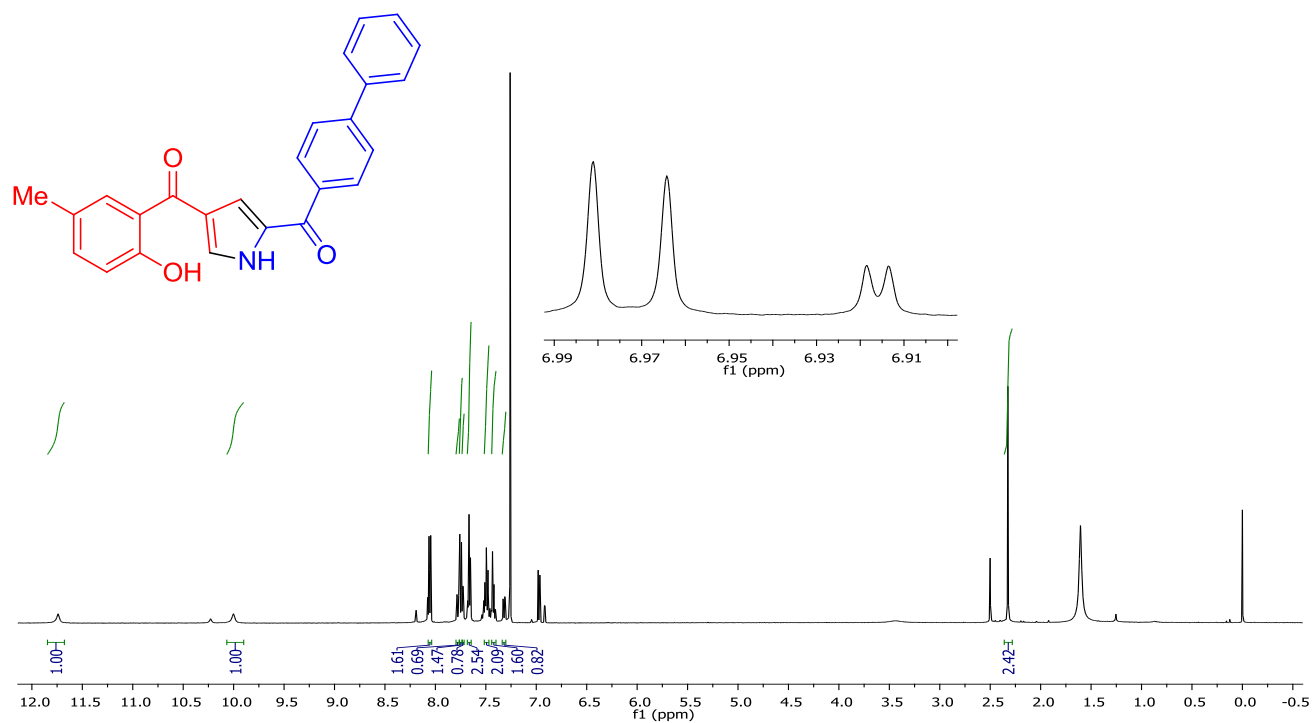

**<sup>1</sup>H NMR (500 MHz, CDCl<sub>3</sub>) spectrum of 5d.**

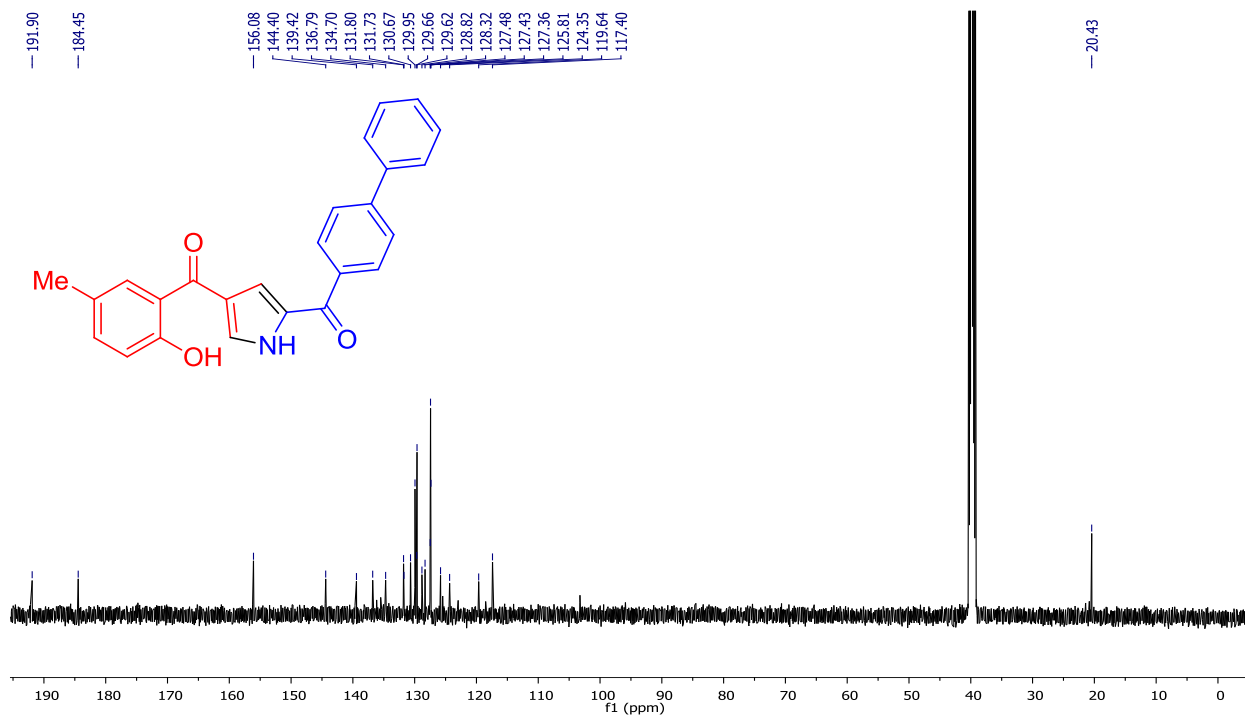

**<sup>13</sup>C NMR (125 MHz, DMSO-*d*<sub>6</sub>) spectrum of 5d.**

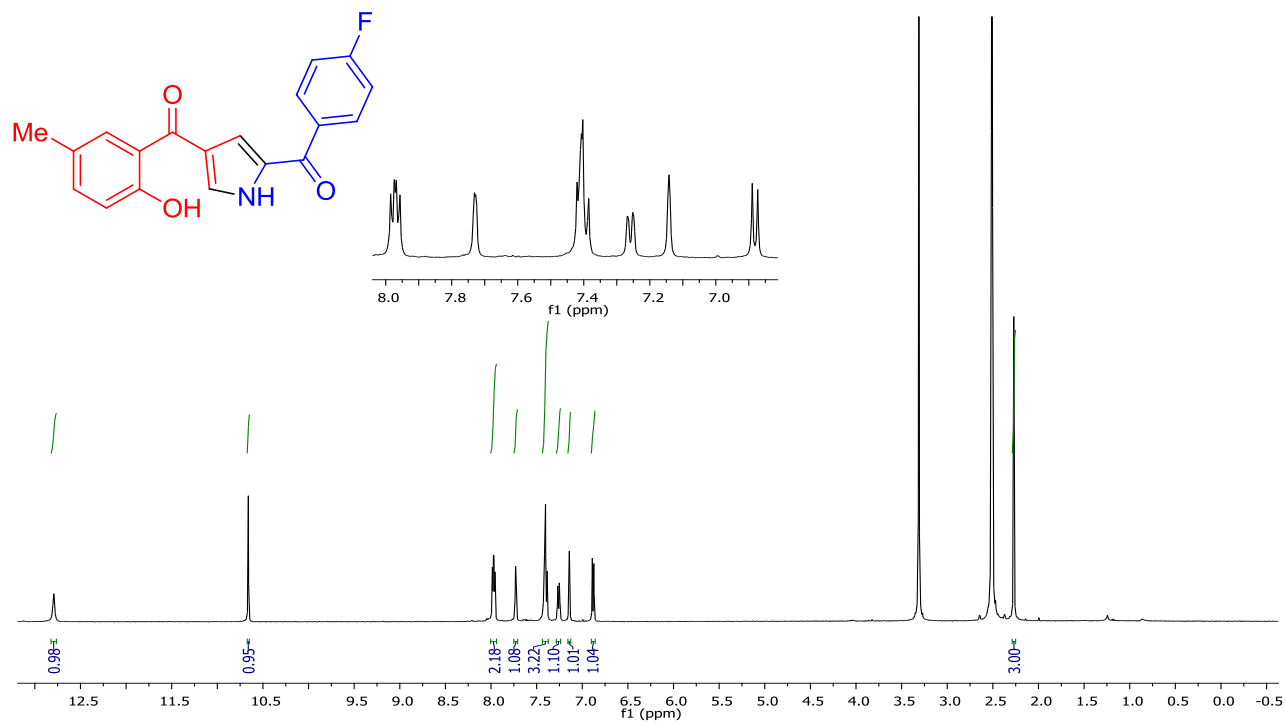

**<sup>1</sup>H NMR (500 MHz, DMSO-*d*<sub>6</sub>) spectrum of 5e**

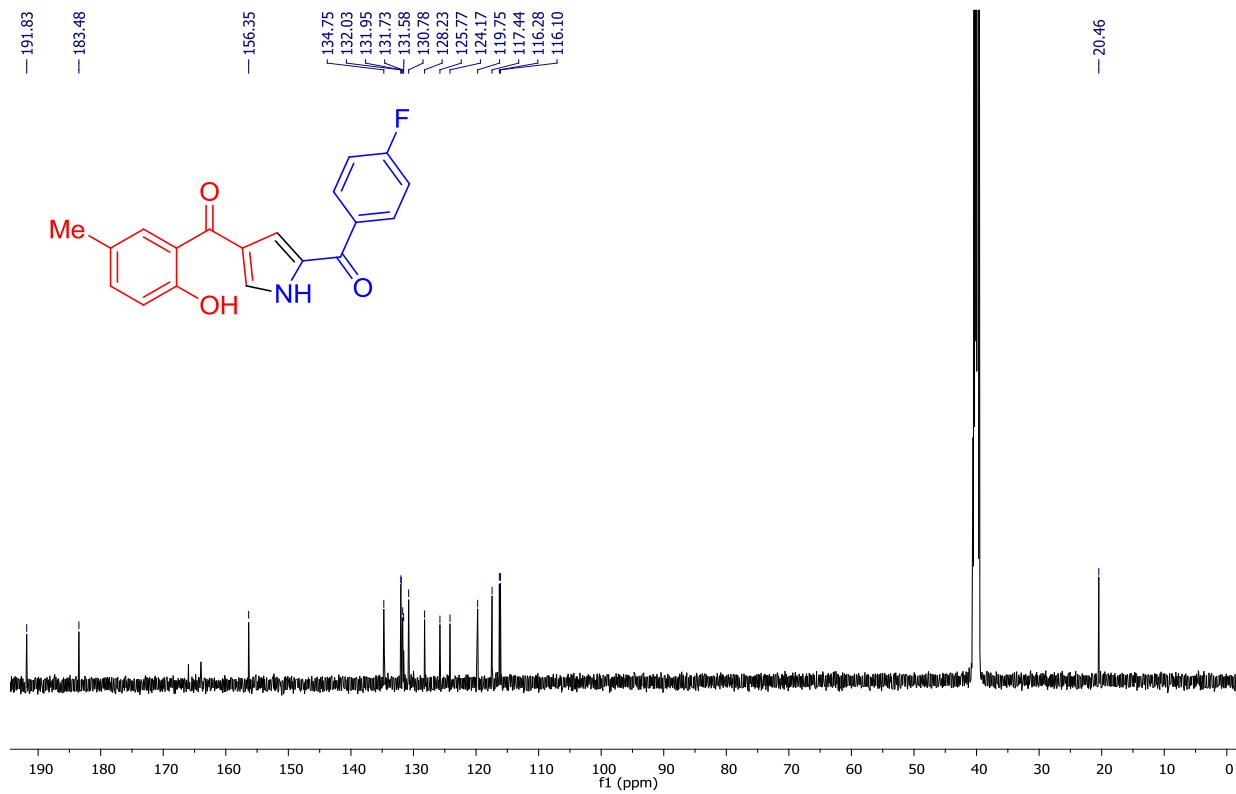

**<sup>13</sup>C NMR (125 MHz, DMSO-*d*<sub>6</sub>) spectrum of 5e**

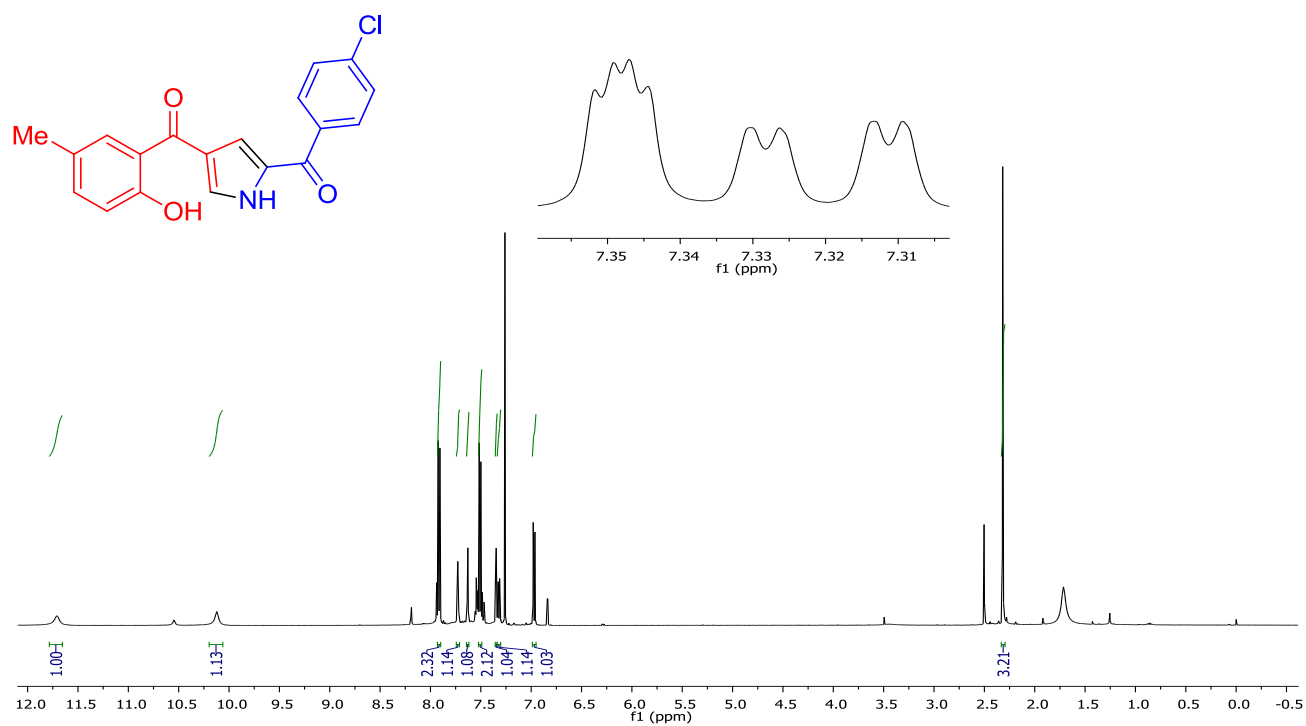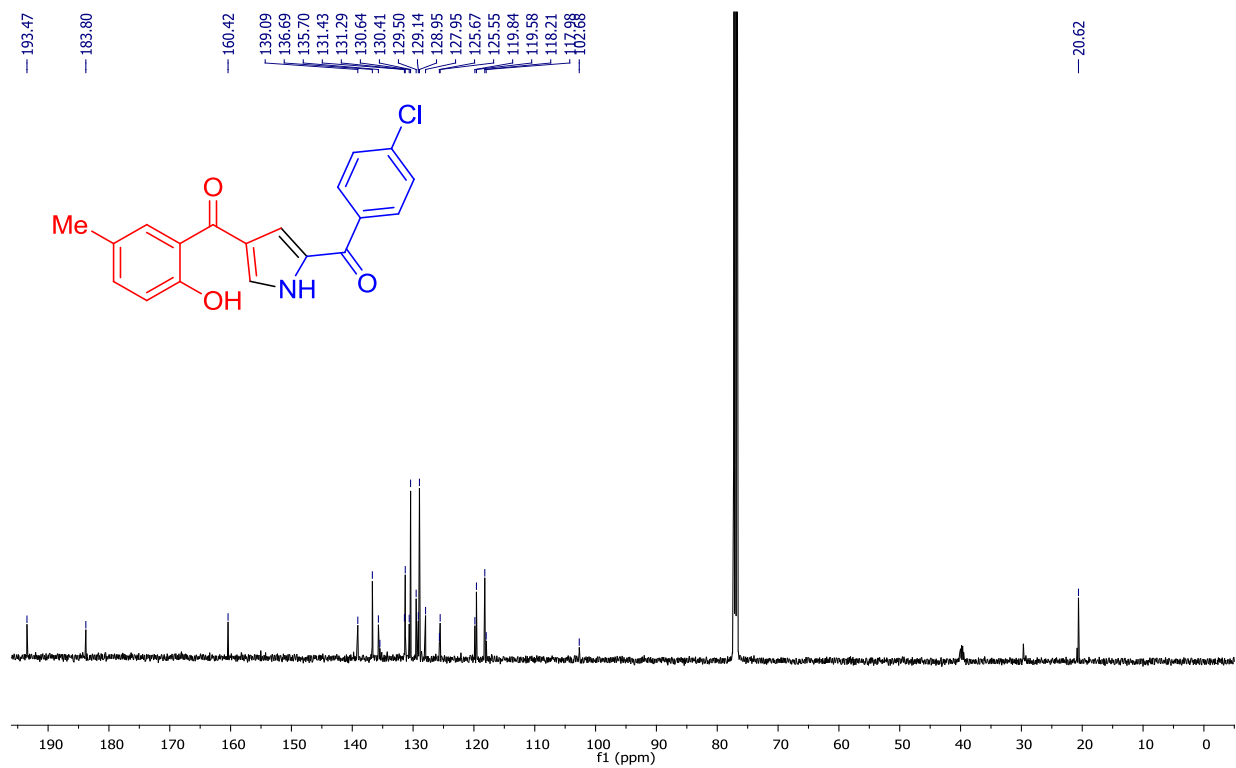

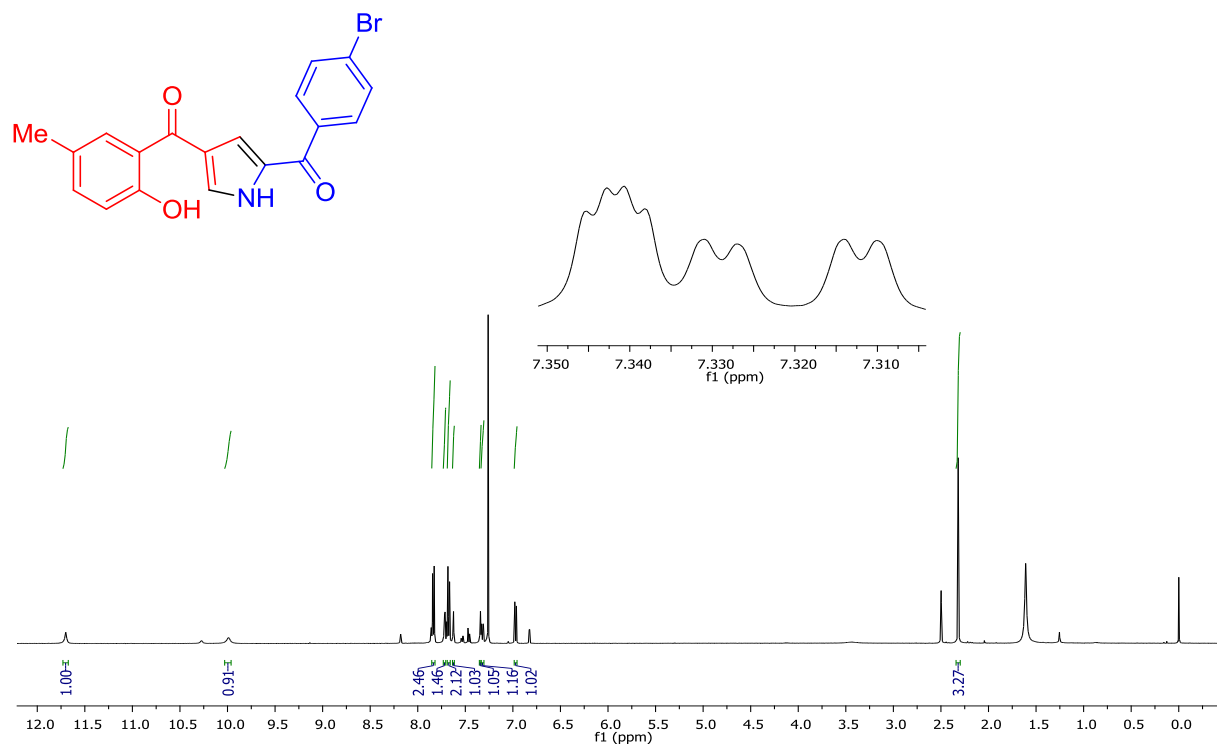

$^1\text{H NMR}$  (500 MHz,  $\text{CDCl}_3$ ) spectrum of **5g**.

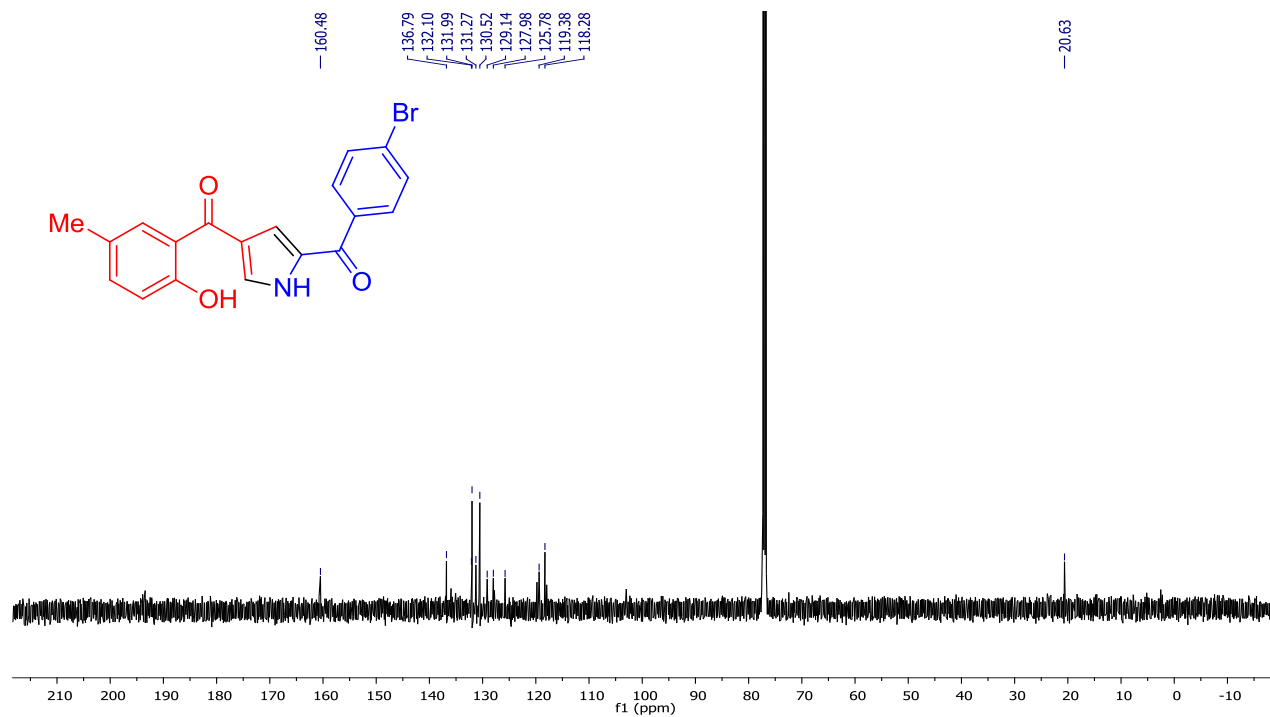

$^{13}\text{C NMR}$  (125 MHz,  $\text{CDCl}_3$ ) spectrum of **5g**.

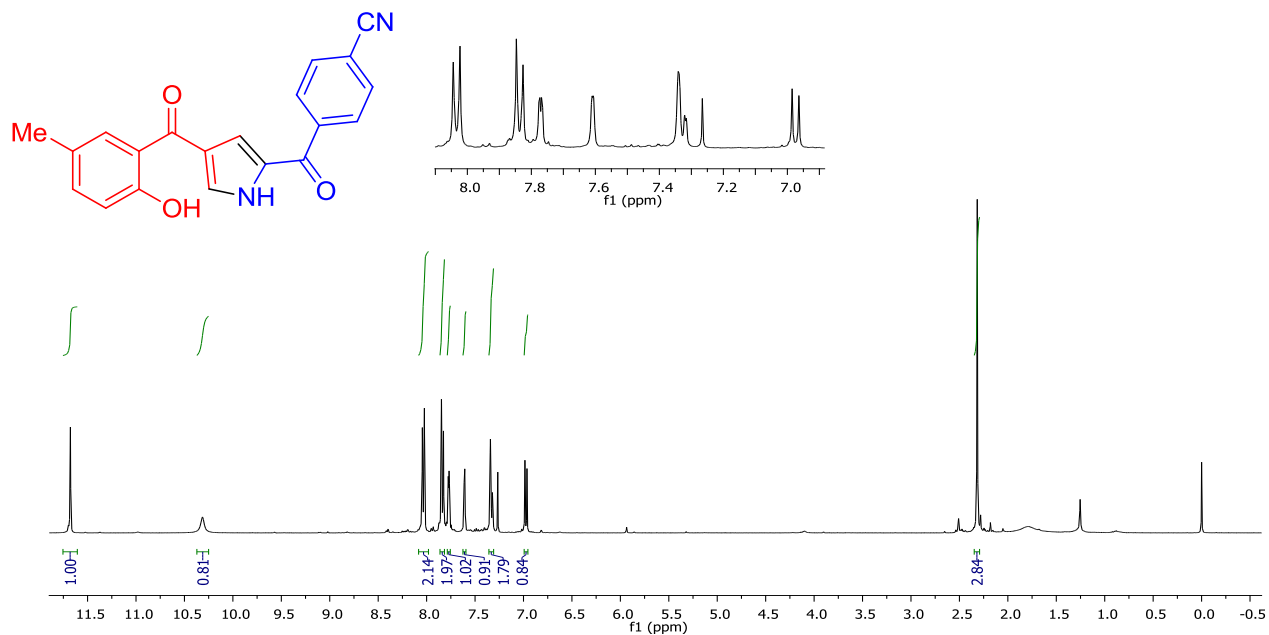

$^1\text{H NMR}$  (500 MHz,  $\text{CDCl}_3$ ) spectrum of **5h**.

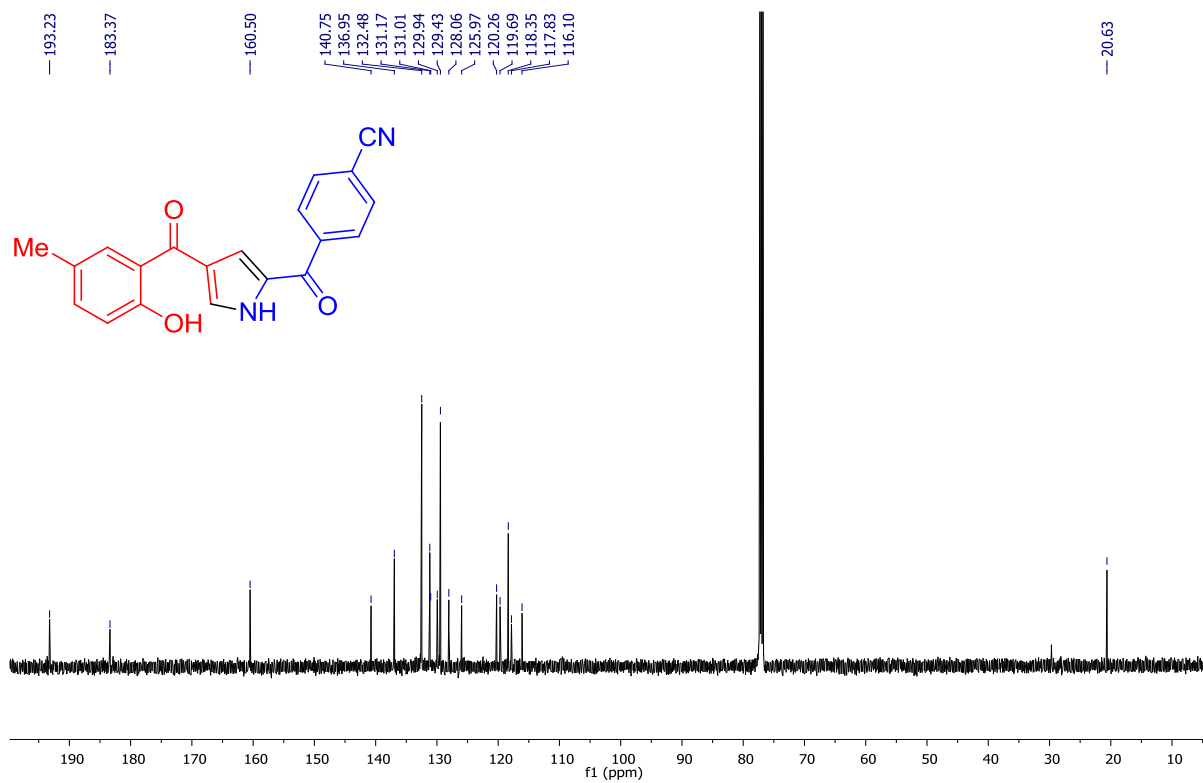

$^{13}\text{C NMR}$  (125 MHz,  $\text{CDCl}_3$ ) spectrum of **5h**.

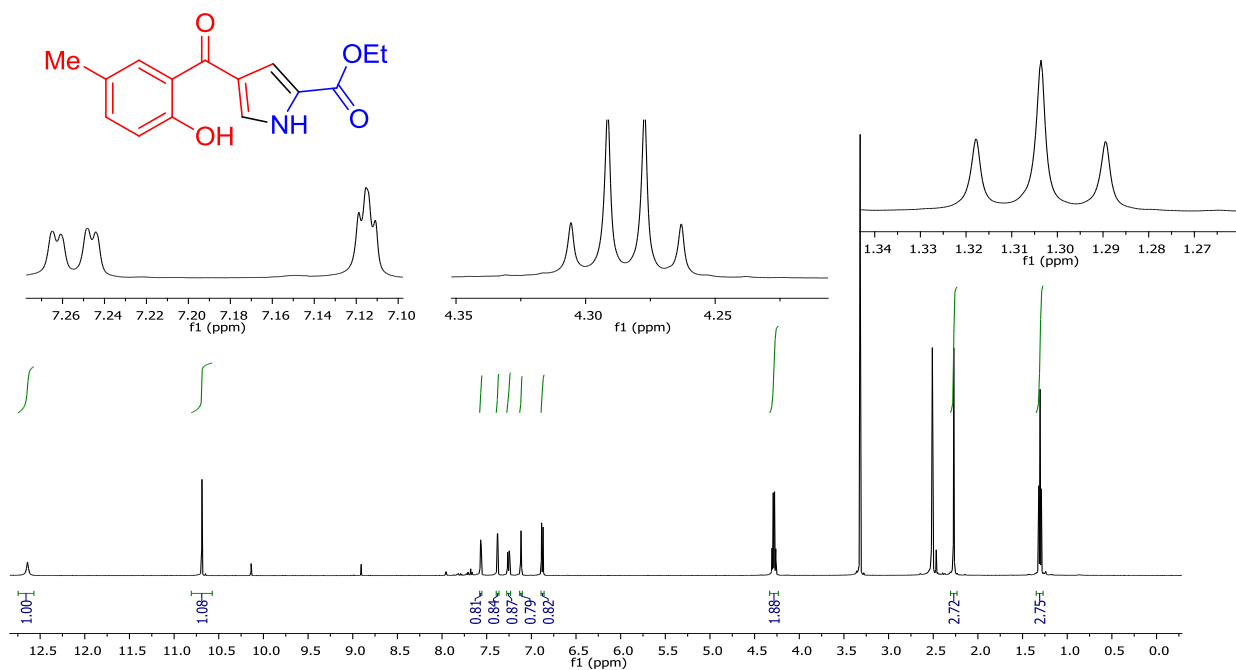

<sup>1</sup>H NMR (500 MHz, DMSO-*d*<sub>6</sub>) spectrum of **5n**.

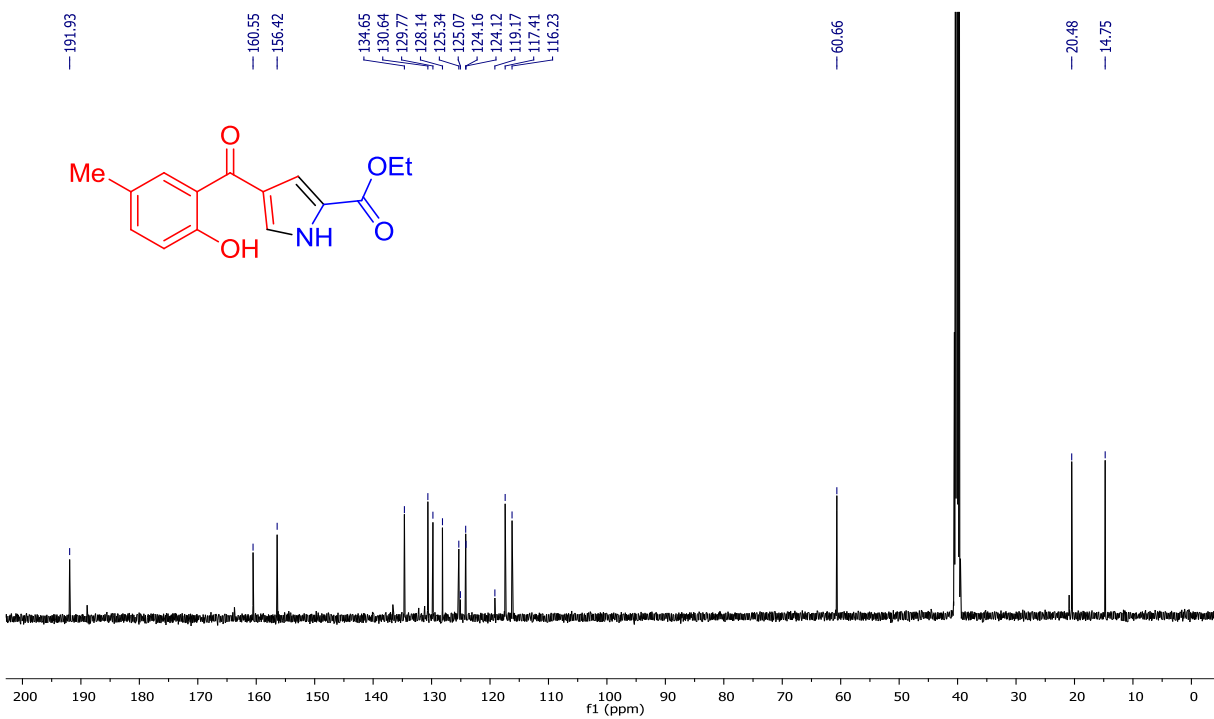

<sup>13</sup>C NMR (125 MHz, DMSO-*d*<sub>6</sub>) spectrum of **5n**.



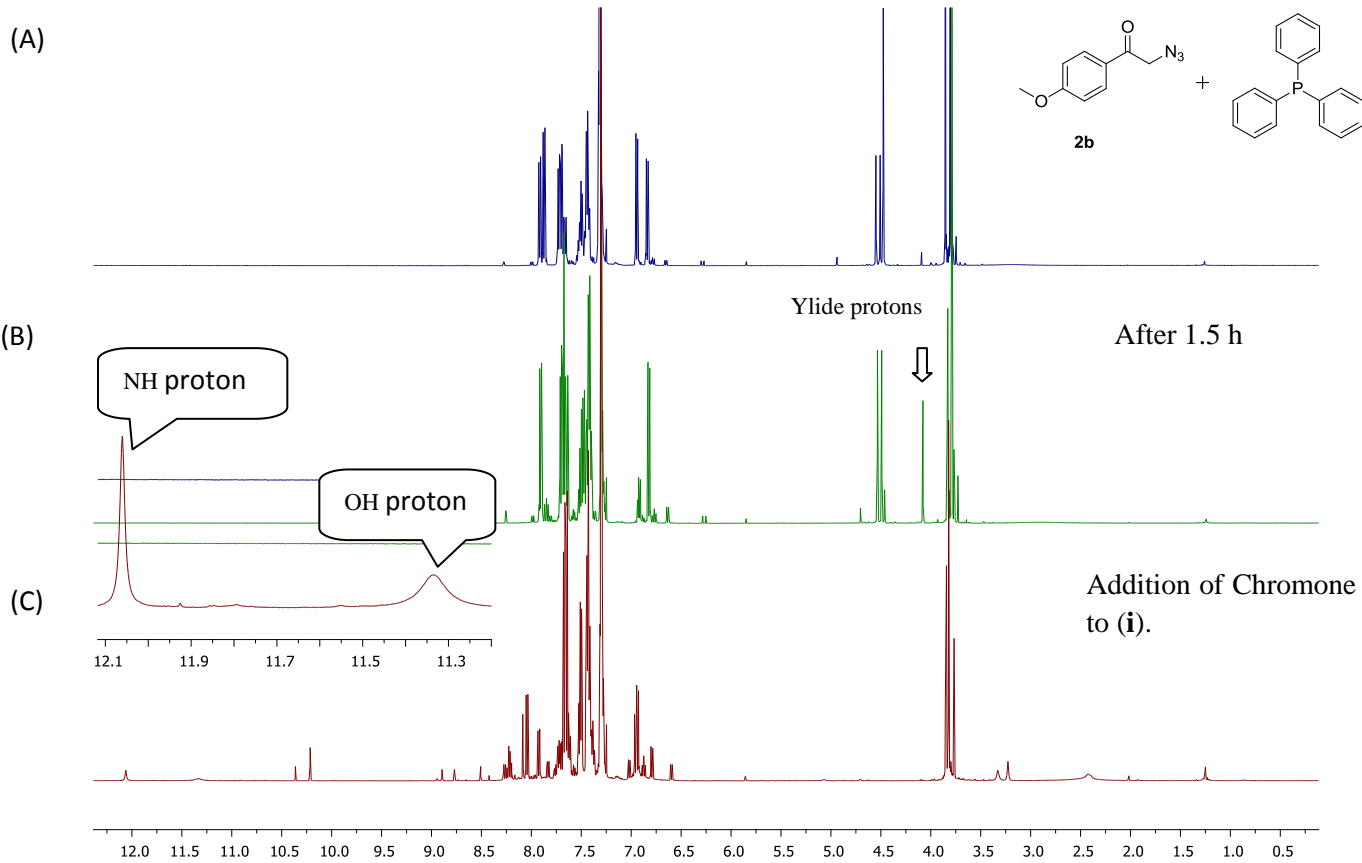

$^1\text{H}$  NMR (500 MHz,  $\text{CDCl}_3$ ) spectrum showing reaction transformation.
